1 **Host cytoskeletal vimentin serves as a structural organizer**  
2 **and an RNA-binding protein regulator to facilitate Zika**  
3 **viral replication**

4  
5 **Yue Zhang<sup>1,2</sup>, Shuangshuang Zhao<sup>3</sup>, Min Li<sup>4</sup>, Yian Li<sup>2,5</sup>, Fengping Feng<sup>6</sup>, Jie**  
6 **Cui<sup>2,5</sup>, Yanhong Xue<sup>6</sup>, Xia Jin<sup>4,\*</sup>, Yaming Jiu<sup>1,2,3,\*</sup>**

7 <sup>1</sup> The Center for Microbes, Development and Health, Key Laboratory of Molecular  
8 Virology and Immunology, Institut Pasteur of Shanghai, Chinese Academy of  
9 Sciences, Shanghai 200031, China

10 <sup>2</sup> University of Chinese Academy of Sciences, Yuquan Road No. 19(A), Shijingshan  
11 District, Beijing 100049, China

12 <sup>3</sup> The Joint Program in Infection and Immunity, a. Guangzhou Women and Children's  
13 Medical Center, Guangzhou Medical University, Guangzhou, 510623 and b. Institut  
14 Pasteur of Shanghai, Chinese Academy of Sciences, Shanghai 200031, China

15 <sup>4</sup> Shanghai Public Health Clinical Center, Fudan University, Shanghai, 201508, China

16 <sup>5</sup> Key Laboratory of Molecular Virology and Immunology, Institut Pasteur of  
17 Shanghai, Chinese Academy of Sciences, Shanghai 200031, China

18 <sup>6</sup> Institute of Biophysics, Chinese Academy of Sciences, Beijing, 100101, China

19

20 \*Correspondence authors:

21 Yaming Jiu, The Center for Microbes, Development and Health, Key Laboratory of  
22 Molecular Virology and Immunology, Institut Pasteur of Shanghai, Chinese Academy  
23 of Sciences, Shanghai 200031, China. Email: ymjiu@ips.ac.cn; Phone:  
24 +86-021-54923175.

25 Xia Jin, Shanghai Public Health Clinical Center, Fudan University, Shanghai 201508,  
26 China. Email: jinxia@shphc.org.cn; Phone: +86-021-37990330 ext. 5322.

27 **ABSTRACT**

28 Emerging microbe infections such as Zika virus (ZIKV) pose an increasing threat to  
29 human health. Current investigations on ZIKV replication have revealed the  
30 construction of replication compartments (RCs) and the utilization of host cellular  
31 endomembranes, without careful examination of the cytoskeletal network. Here, we  
32 investigated the function of vimentin, one of the intermediate filaments (IFs) that play  
33 a central role in basic cellular functions and diseases, in the life cycle of ZIKV  
34 infection. Using advanced imaging techniques, we uncovered that vimentin filaments  
35 have drastic reorganization upon viral protein synthesis, to form a perinuclear  
36 cage-like structure that embraces and concentrates RCs. Genetically removal of  
37 vimentin markedly reduced viral genome replication, viral protein production and  
38 infectious virions release, without interrupting viral binding and entry. Furthermore,  
39 proteomics and transcriptome screens by mass spectrometry and RNA sequencing  
40 identified intense interaction and regulation between vimentin and hundreds of  
41 endoplasmic reticulum (ER)-resident RNA-binding proteins. Among them, the  
42 cytoplasmic-region of ribosome receptor binding protein 1 (RRBP1), an ER  
43 transmembrane protein directly binds viral RNA, can interact with vimentin, resulting  
44 in modulation of ZIKV replication. Together, our work discovered a dual role for  
45 vimentin as being not only a structural element for RCs but also an  
46 RNA-binding-regulating hub in the ZIKV infection model, unveiling another layer of  
47 the complexity between host and virus interaction.

48

49 **KEY WORDS:** intermediate filaments; vimentin; Zika virus; replication  
50 compartments; RNA-binding protein

51

## 52 INTRODUCTION

53 Zika virus (ZIKV), a mosquito-borne enveloped RNA virus that belongs to the  
54 Flaviviridae family, has gained notoriety recently, due to its explosive outbreaks and  
55 association with serious clinical diseases such as Guillain-Barré syndrome in adults  
56 and microcephaly in newborns (Cao-Lormeau et al. 2016, Pierson and Graham 2016,  
57 Rasmussen et al. 2016, Pierson and Diamond 2018). Currently, no ZIKV-specific  
58 therapies or prophylactic vaccines are available (Poland et al. 2019). ZIKV genome is  
59 a positive-sense, single-stranded RNA (ssRNA(+)) (Musso and Gubler 2016). The  
60 viral replication occurs on the surface of the endoplasmic reticulum (ER), where the  
61 double strand RNA (dsRNA) is synthesized from viral genomic ssRNA(+) and  
62 transcribed into new proteins (Munjal et al. 2017, Lee et al. 2018). The viral genome  
63 is translated into a polyprotein which is proteolytically processed into 3 structural  
64 proteins (capsid (C), precursor membrane (prM) and envelop (Env)) and 7  
65 nonstructural proteins (NS1, NS2A, NS2B, NS3, NS4A, NS4B, and NS5), by both  
66 host and viral proteases (Shi and Gao 2017, Sirohi and Kuhn 2017).

67

68 Vimentin is the most abundant intermediate filaments (IFs) which generally surrounds  
69 the nucleus and extends throughout the cytoplasm, providing help to important  
70 biological processes such as organelle positioning, cell migration and cell signaling  
71 (Lowery et al. 2015). As a highly dynamic filaments that rapidly respond to  
72 physiological stimuli through self-assembly and disassembly (Danielsson et al. 2018),  
73 vimentin' role in virus infections has gained increasing attention. For instance, it  
74 either acts as a co-receptor to help virus invading target cells, or guides transportation  
75 of virus to the replication site, or reorganizes into aggregated structures surrounding  
76 replication compartments (RCs), or recruits viral elements to the location of assembly  
77 and egress (Dohner and Sodeik 2005, Foo and Chee 2015, Denes et al. 2018, Zhang et  
78 al. 2019, Ramos et al. 2020, Zhang et al. 2020). Vimentin network rearrangement has  
79 been previously observed in the infection of adenovirus type 2 and type 5 (Defer et al.  
80 1990), African swine fever virus (ASFV) (Stefanovic et al. 2005, Netherton and

81 Wileman 2013), coxsackievirus B3 (Matilainen 2016, Turkki et al. 2020), dengue  
82 virus type 2 (DENV-2) (Lei et al. 2013, Teo and Chu 2014), foot-and-mouth disease  
83 virus (FMDV) (Gladue et al. 2013, Ma et al. 2020), frog virus 3 (Murti et al. 1988),  
84 transmissible gastroenteritis virus (Zhang et al. 2015), vaccinia virus (Risco et al.  
85 2002), and SARS-CoV-2 (Cortese et al. 2020).

86

87 A common feature for *Flaviviruses* infection is the induction of cellular  
88 endomembrane rearrangements to establish viral RCs, which increase the local  
89 concentration of viral and cellular factors for efficient viral replication (Neufeldt et al.  
90 2018, Cortese et al. 2017, Mohd Ropidi et al. 2020). In the case of ZIKV, infection  
91 could induce the rearrangement of F-actin in the cell periphery (Nie et al. 2021), and  
92 enwrapping of dsRNA-positive structures by bundled microtubules (MTs) and  
93 cytokeratin 8 and nestin IFs (Cortese et al. 2017). Perturbation of F-actin by  
94 cytochalasin D or Jasplakinolide enhanced ZIKV infection (Nie et al. 2021), while  
95 pharmacological treatment with MTs-stabilizing drug paclitaxel strongly reduced  
96 ZIKV titer (Cortese et al. 2017). Despite rearrangement of vimentin has been  
97 observed in ZIKV infection (Pagani et al. 2017), the dynamic changes of vimentin IFs  
98 during ZIKV lifecycle and its contribution to RCs construction and integrity remain  
99 understudied.

100

101 Besides exploiting cytoskeletal networks, ZIKV can hijack ER-resident proteins, such  
102 as ER-localized RNA-binding proteins vigilin and ribosome-binding protein 1  
103 (RRBP1), to facilitate viral genome replication and viral protein translation (Ooi et al.  
104 2019). In addition to provide structural scaffold, there are evidence indicating that  
105 cytoskeletal proteins may regulate translational apparatus (Kim and Coulombe 2010).  
106 For instance, ribosomes can physically associate with MTs and F-actin in different  
107 cells (Hamill et al. 1994, Medalia et al. 2002). Disorganization of F-actin by  
108 cytochalasin D impairs local protein synthesis in isolated axoplasmic nerve fibers  
109 (Sotelo-Silveira et al. 2008). The interaction between keratin IFs and  $\beta$  subunit of

110 eukaryotic elongation factor-1 (eEF1B $\beta$ ) plays an essential role in protein synthesis  
111 (Kim et al. 2007). MTs can bind to cytoplasmic tail of RRBP1 and take part in ER  
112 organization and neuronal polarity (Ogawa-Goto et al. 2007, Farias et al. 2019).  
113 However, information on the spatial and functional relationship between vimentin IFs  
114 and the translational machinery, especially in the context of virus infection, remain  
115 incomplete.

116

117 In this study, we investigated the function of vimentin IFs in ZIKV infection. By  
118 monitoring spatial-temporal responses of cellular vimentin network throughout  
119 various steps of ZIKV life cycle, we demonstrated that ZIKV infection induces  
120 massive rearrangements of cytoplasmic vimentin. When vimentin protein was  
121 genetically depleted from cells, distribution of viral proteins is scattered within  
122 infected cells, and viral RNA replication, protein synthesis, and virion release are  
123 subsequently reduced. Using mass spectrometry and RNA sequencing analysis, we  
124 discovered interactions between vimentin and RNA-binding proteins, and vimentin  
125 binding to RRBP1 facilitates ZIKV RNA replication. Thus, our work establishes  
126 important connections among vimentin filaments dynamics, ZIKV RCs, cellular  
127 RNA-binding proteins in highly effective infection.

128 **RESULTS**

129 **ZIKV infection induces drastic cellular vimentin rearrangement and formation**  
130 **of cage-like structures**

131 To study whether host cytoskeletal proteins respond to ZIKV infection, we examined  
132 vimentin network using an established model with human osteosarcoma cells (U2OS)  
133 that express abundant cytoskeletal filaments and are highly susceptible to viruses (Jiu  
134 et al. 2015, Rausch et al. 2017, Hackett et al. 2019) (Fig 1A,E). The cells were  
135 infected with an ZIKV Asian lineage strain, SZ01, and fixed at different time points  
136 post infection (hpi). Viral structural protein envelop (Env) and endogenous vimentin  
137 were visualized by immunofluorescence. In mock infected cells, vimentin filaments  
138 showed perinuclear localization and radiated towards cell periphery with apparent  
139 filamentous structure (Fig 1A). However, the localization of vimentin rearranged  
140 markedly and formed compact aggregation together with viral protein near nucleus,  
141 without any notable changes on cell size and overall morphology, within 48 hpi (Fig  
142 1A,B).

143

144 A time course study showed that viral RNA replication initiated from 8 hpi and  
145 reached to a plateau at 36 hpi and onwards, concurrently, viral proteins start to  
146 synthesize from 12 hpi and become more pronounced afterwards (Fig 1C,E). It was  
147 evident from the quantification that both viral RNA appearance and protein synthesis  
148 started before the virus-induced vimentin rearrangement, which was not yet initiated  
149 at 16 hpi. The vimentin compartments only appeared to shrink at around 24 hpi,  
150 progressively reached to a plateau at 36 hpi (Fig 1B-E). This suggests that vimentin  
151 concentration is not required to initiate virus replication. Instead, the emergence of  
152 viral proteins may act as a trigger for the vimentin rearrangements to occur.

153

154 At the protein levels, however, cytoskeletal components including actin, tubulin and  
155 vimentin were similar between ZIKV infected and mock-infected cells throughout the  
156 infection lifecycle (Fig 1E). Different from vimentin, neither actin nor tubulin

157 network show significant redistribution during ZIKV infection (Fig S1C), indicating a  
158 vimentin-specific response to infection.

159

160 Considering vimentin reorganization usually accompanies the assembly and  
161 disassembly of the filaments regulated by phosphorylation (Inagaki et al. 1987),  
162 which modulates vimentin solubility (Snider and Omary 2014), we performed cellular  
163 fractionation experiment and western blot analysis. Immunoblotting showed  
164 negligible changes of vimentin content in both the cellular (soluble) and cytoskeletal  
165 (insoluble) fraction, as well as the phosphorylation levels from 16 hpi onwards (Fig  
166 S1A,B), suggesting that the drastic rearrangement of vimentin was not associated with  
167 its assembly turnover or posttranslational modification. To further explore whether  
168 microtubules (MTs) are the machinery responsible for vimentin transportation  
169 towards nucleus, we applied two drugs inhibiting assembly of MTs and the activity of  
170 its retro-wards motor dynein, respectively, and found that these drugs did not prevent  
171 virus induced vimentin retraction, ruling out the possible involvement of  
172 MT-dominated aggresomal transportation system (Fig S1D).

173

174 To describe the detailed dynamics of vimentin filaments rearrangement, we generated  
175 a vimentin-mCherry stable expression cell line and performed live-cell imaging  
176 analysis. A high MOI of input virus was used to achieve infection of every cell  
177 recorded. In mock-infected cells, no apparent changes of vimentin were observed  
178 within a 30 h monitoring period (Fig 1D). In contrast, vimentin filaments gradually  
179 gathered around nucleus from ~20 hpi and progressively intensified in ZIKV-infected  
180 cells (Fig 1D; Video S1,S2).

181

182 ZIKV multiplies in perinuclear replication compartments (RCs) (Welsch et al. 2009;  
183 Caldas et al. 2020). In order to gain insight into the spatial relationship between  
184 vimentin and viral protein, we took advantage of the three-dimensional-structured  
185 illumination microscopy (3D-SIM) for super-resolution visualization. Side view of 3D

186 images discovered that vimentin filaments form a hollow cage-like structure that wrap  
187 structural protein Env as well as nonstructural proteins NS1 and NS4B (Fig 1F; Fig  
188 S1E). Furthermore, electronic microscopy elaborated events of enrichment of IFs-like  
189 filaments next to the concentrated area of viral particles in the perinuclear region (Fig  
190 1G; Fig S1G). Together, these imaging observations indicated that ZIKV infection  
191 induced vimentin-cage formation around RCs.

192

### 193 **Exogenous expression of Zika viral protein leads to vimentin enrichment in the** 194 **perinuclear area**

195 To further dissect the role of viral protein in vimentin rearrangement, we transfected  
196 vimentin-mCherry-expressing cells with moderate concentrations of EGFP tagged  
197 Env protein and monitored vimentin dynamics. The results showed that during 1.5 h  
198 real-time monitoring after overnight transfection, vimentin filaments and viral Env  
199 protein accumulated next to nucleus synchronously (Fig 2A; Video S3). By tracing  
200 the fluorescent intensity of perinuclear region, vimentin was found to be gathered  
201 significantly faster (Fig 2B).

202

203 Moreover, the retrograde movement of vimentin filaments gather the scattered viral  
204 protein, as visualized by individual fluorescent foci, to the perinucleus region (Fig 2C;  
205 Video S4), indicating a potential for vimentin being a pro-viral factor. Together, these  
206 results suggest that the cellular machinery recognizing foreign viral protein triggers  
207 events leading to varied vimentin arrangement.

208

### 209 **Host vimentin is required for the integrity of viral replication compartments and** 210 **efficient infection**

211 Vimentin has gained more attention on its roles in various viral infections (Dohner  
212 and Sodeik 2005, Foo and Chee 2015, Denes et al. 2018, Zhang et al. 2019, Ramos et  
213 al. 2020, Wen et al. 2020, Zhang et al. 2020). To determine whether there is a causal  
214 relationship between vimentin rearrangement and ZIKV infection, we used



215 CRISPR/Cas9 method to establish vimentin-knockout (KO) in U2OS cells and Huh7  
216 (Fig S2A,D). Results showed that reducing vimentin levels neither affected the cell  
217 viability nor cell growth (Fig S2B,C,E). We next used lentiviral system to establish  
218 vimentin KO-full length (FL) rescue cells, and verified the levels of vimentin protein  
219 express in these cells by western blot (Fig S2A).

220

221 In these cells, we observed not only similar vimentin network shrinkage and  
222 formation of a concrete compartment for viral RCs, but also viral protein localization  
223 at a subcellular level (Fig 3A). Intriguingly, viral protein staining for Env, NS1 and  
224 NS4B displayed a piecemeal distribution in vimentin KO cells (Fig 3A, Fig S2I,J), but  
225 rarely seen in wild-type cells. Moreover, depletion of vimentin dramatically increases  
226 the proportion of partitioned cellular viral protein compartments up to 85% and  
227 reduces the total viral protein area, both of which can be fully rescued when  
228 full-length vimentin was reintroduced (Fig 3A-C). Nevertheless, vimentin which  
229 forms unit length filaments (ULF) or squiggles was not able to fully rescue the viral  
230 dispersion phenotype observed in infected cells (Fig 3A,B).

231

232 How this scattered subcellular distribution of viral protein influences the infectivity?  
233 To address this, we subsequently measured viral genome replication by qRT-PCR and  
234 viral protein expression by western blot in vimentin KO cells. It is apparent that the  
235 absence of vimentin caused significant reduction of viral RNA copies and structural  
236 protein Env levels at both 24 and 48 hpi (Fig 3D,E), and reintroducing vimentin  
237 partially rescued the viral protein expression (Fig 3E). Virus titer was further  
238 measured and as expected, there was at least 20-fold less of viruses released from  
239 vimentin depleted cells at 48 hpi (Fig 3F). Similarly, in Huh7 cells, vimentin depletion  
240 showed defective infection as that in U2OS cells (Fig S2F-H).

241

242 By immunostaining and flow cytometry, fewer infected cells were detected in  
243 vimentin depletion background at 24 and 48 hpi, the fast replication period during

244 viral life cycle (Fig 3G,H), suggesting that vimentin is critical for efficient ZIKV  
245 infection. Taken together, depletion of host vimentin leads to compromised viral  
246 infection as demonstrated by less genome replication, reduced protein expression, and  
247 fewer particle production, most probably as a result of the disruption of the integrity  
248 of concentrated perinucleus RCs.

249

250 **Vimentin depletion compromises viral genome and protein synthesis without**  
251 **affecting viral binding and entry to the host cell**

252 To further investigate the function of vimentin, a time course of infection experiment  
253 was performed. Changes of viral RNA copies in wild-type and vimentin KO cells  
254 were confirmed by qRT-PCR. Although the viral RNA numbers were the same at the  
255 beginning of infection, their copies in vimentin KO cells were significantly lower than  
256 that in wild-type cells during the later period of infection (Fig 4A). Apart from the  
257 replication dynamics of viral genome, viral proteins in both backgrounds accumulated  
258 gradually, but vimentin depletion led to a slower accumulation and thus much less  
259 viral Env protein expression at each time point from 16 hpi onwards (eg. 20, 24, 36,  
260 48 hpi), compared to wild-type cells (Fig 4B).

261

262 The observed low levels of viral Env protein expression in vimentin KO cells could  
263 be due to a decrease in protein biogenesis and/or an increase in protein degradation.  
264 We therefore tested whether vimentin could influence the stability of ZIKV proteins.  
265 Plasmid expressing Env-EGFP fusion protein was transiently transfected into cells  
266 and analyzed by western blot 48 h later. The results showed that vimentin depletion  
267 dramatically reduced the exogenous expression of Env-EGFP (Fig 4D-F). We next  
268 treated cells with cycloheximide (CHX, 20  $\mu$ g/mL for 11 h) to inhibit protein  
269 translation, and found that viral Env was relatively stable in both wild-type and  
270 vimentin KO cells (Fig 4D). These suggest that vimentin acts on protein biosynthesis  
271 but not degradation. The following experiments further confirmed this assertion.

272 There are two classic destinations for cellular protein degradation regulated by  
273 proteasomal and lysosomal pathways. To further analyze whether depletion of  
274 vimentin promotes the degradation of viral protein and via which way, cells  
275 transfected with Env-EGFP were treated with proteasomal specific inhibitor MG132  
276 (10  $\mu$ M for 11 h), or lysosomal specific inhibitor ammonium chloride (NH<sub>4</sub>Cl) (25  
277 mM for 11 h) (Fig 4C). Immunoblot analysis showed that the Env-EGFP protein level  
278 apparently increased in both wild-type and vimentin depletion cells after MG132  
279 treatment (Fig 4E), but not influenced by NH<sub>4</sub>Cl application (Fig 4F). Concurrently,  
280 p21 and LC3, known proteins for proteasome and lysosomal degradation, respectively,  
281 were chosen as positive controls for these experiments. Combing results of the  
282 increased Env upon MG132 treatment and unaltered Env upon NH<sub>4</sub>Cl treatment, it is  
283 reasonable to conclude that Env protein was degraded mainly via proteasomal  
284 pathway and vimentin depletion does not interrupt the degradation of Env protein.

285

286 Given that vimentin shrinking was visualized from 24 hpi but not before, we  
287 speculated that the early steps of viral replication were not affected in vimentin  
288 depletion cells. To confirm this, we used two assays to examine binding and entry  
289 steps (Fig 4H), respectively. Cells were infected by ZIKV for 1 h at 4 $\square$ , directly or  
290 incubated for 1 more hour at 37 $\square$ , washed and then cell lysates collected for  
291 measurement of RNA copies by RT-qPCR (Fig 4G). The results confirmed that both  
292 the binding and entry of ZIKV are similarly efficient in wild-type and vimentin KO  
293 cells (Fig 4H). Collectively, these results suggest that vimentin acts on the production  
294 and accumulation of ZIKV proteins as well as the efficient replication of ZIKV RNA,  
295 without influencing viral internalization.

296

### 297 **A large number of host RNA-binding proteins interact with and being regulated** 298 **by vimentin during ZIKV infection**

299 Since the perinuclear expression of vimentin is highly associated with ER where viral  
300 RNA replication and protein translation take place, we speculate that aside from being

301 a structural scaffold, vimentin may interact with host factors that regulate viral RNA  
302 transcription and subsequent protein synthesis. To test this, we implemented mass  
303 spectrometry (MS) analysis to identify proteins interacting with vimentin, and  
304 subjected 1050 candidates to gene ontology (GO) analyses by DAVID (The Database  
305 for annotation, visualization and integrated discovery). The recognized vimentin  
306 interactors were classified based on three taxonomic features including molecular  
307 function, cellular component and biological process. From the classification analysis,  
308 we found that a large proportion of candidates interacted with vimentin are RNA  
309 binding proteins and ribosome components (Fig 5A), and they are intimately related  
310 to RNA processing, translation and viral transcription (Fig 5B). Importantly, GO  
311 annotation revealed a significant enrichment of ER components with vimentin (Fig  
312 5C), indicating that vimentin is the principal factor that interacts with ER-associated  
313 RNA-binding proteins (RBPs) in host cells.

314

315 To complement with the interactome assay, RNA sequencing (RNA-Seq) was  
316 subsequently applied to analyze the variations of global gene transcription in both  
317 wild-type and vimentin KO cells infected (or not) with ZIKV. A total of 1408 genes  
318 were significantly affected ( $P < 0.05$ ), including 518 up- and 890 down- regulated  
319 genes in vimentin depletion background upon ZIKV infection (Fig S3C). Among the  
320 downregulated hits, there are many ER-localized genes related to double-strand RNA  
321 binding and transcription regulation (Fig S3A,B), as well as a large proportion of  
322 genes involved in antiviral immune and inflammatory response (Fig 5D). Together  
323 with the MS result, we conclude that aside from contributing to RCs scaffolding  
324 which provides a structural support, vimentin is also involved in processing viral  
325 RNA replication and serving a functional role.

326

327 Given the critical role of ER in ZIKV infection, we more carefully examined  
328 candidates with ER localization in both MS and RNA-Seq results (Fig 5E,F). By  
329 investigating ER annotated candidates, we obtained top 15 vimentin-interacting

330 proteins by setting the threshold of interacting peptides coverage over 30% from MS  
331 results (Fig 5E; Table S1). Concurrently, RNA-Seq data were analyzed and the results  
332 demonstrated dramatical changes of the mRNA levels of many ER-associated genes,  
333 among them, 80% of significantly differentially expressed genes were downregulated  
334 (Fig 5F). By crosschecking MS and RNA-Seq candidates, ER-resident protein  
335 ribosome-binding protein 1 (RRBP1, also known as p180) was recognized as the only  
336 common hit, which shows high endogenous expression in wild-type and substantially  
337 down-regulated expression in vimentin KO cells during ZIKV infection (Fig 5F). Of  
338 note, it has been recently reported that RRBP1 play a pronounced role in flaviviruses  
339 (eg. DENV, ZIKV) infection by directly binding to viral RNA (Ooi et al. 2019). We  
340 thus focused on RRBP1, and asked how the interaction between vimentin and RRBP1  
341 influence ZIKV infection.

342

#### 343 **ER-resident RRBP1 interacts with and regulated by vimentin to catalyze ZIKV** 344 **infection**

345 RRBP1 contains a short ER luminal domain, a transmembrane domain, and a large  
346 cytoplasmic domain containing tandem repeats motif (Reid and Nicchitta 2015) (Fig  
347 6A). RRBP1 peptides interacting with vimentin identified from MS were located  
348 mostly in the cytoplasmic coiled-coil region (25 out of 28 recognized peptides) (Fig  
349 6A, Table S2). We subsequently performed the pull-down assay by using purified  
350 His-tagged vimentin protein with an RRBP1 antibody as probe. The results confirmed  
351 that RRBP1 indeed interacts with vimentin both *in vivo* and *in vitro* (Fig 6B).

352

353 Next, we explored the correlation between the cellular expression of vimentin and  
354 RRBP1 upon ZIKV infection. Immunofluorescence results showed that in wild-type  
355 cells, both vimentin and RRBP1 are accumulated around nucleus where ER network  
356 resides (Fig 6C). Upon ZIKV infection, both vimentin and RRBP1 aggregated near  
357 the nucleus and co-localized with dsRNA-staining positive viral RNA (Fig 6C; Fig  
358 S4D), indicating both of them have participated in the viral RCs process.

359 To elucidate the relationship between vimentin and RRBP1, we compared the RNA  
360 level, protein level and the localization of RRBP1 in wild-type and vimentin KO cells.  
361 Results showed that depletion of vimentin reduced both the mRNA and protein levels  
362 of RRBP1 to around 50%, and enlarged the cellular distribution of RRBP1 (Fig 6D,E;  
363 Fig S4A-C,E). In contrast, deprivation of RRBP1 neither affect the mRNA nor the  
364 protein level of vimentin (Fig 6G; Fig S4F). Imaging data showed that lacking  
365 vimentin led to an expansion of the subcellular RRBP1 in uninfected cells (Fig 6C).  
366 Consistently, upon ZIKV infection, RRBP1 turned into scattered segregation in  
367 vimentin KO cells, similar as segregated viral proteins (Fig 3A; Fig 6C), indicating  
368 that disruption of RCs integrity by vimentin influenced not only viral components but  
369 also host viral-binding components. It is subsequently noted that the colocalization  
370 between RRBP1 and viral dsRNA were significantly reduced (Fig 6C,F), suggesting  
371 that vimentin depletion reduced the combined abundance of viral-host constituents in  
372 RCs. Therefore, these results suggested that RRBP1 is one of the effectors of vimentin  
373 in both normal and infection conditions, through which ZIKV replication was  
374 affected.

375

376 To verify this, we generated RRBP1 knockdown (KD) cells in both wild-type and  
377 vimentin KO background by shRNA (Fig 6G; Fig S4E,F) and then infected them with  
378 ZIKV. Consistent with a previous study (Ooi et al. 2019), RRBP1 KD reduced viral  
379 RNA copies by about 40% (Fig 6H). In comparison, the effect of vimentin depletion  
380 on the reduction of viral genome replication was much more severe than that of  
381 RRBP1 KD; however, the double depletion has no additive effects (Fig 6H),  
382 suggesting that RRBP1 and vimentin located in the same regulating cascade during  
383 ZIKV infection. Next, synthesized viral protein was analyzed. The absence of  
384 vimentin resulted in significant reduction of structural protein Env, but the absence of  
385 RRBP1 alone showed no obvious effect (Fig 6I), indicating that RRBP1 plays a role  
386 in viral RNA replication rather than protein synthesis. Taken together, these results  
387 demonstrate a pivotal role of vimentin as an upstream factor regulating one of the

388 known viral-binding host factor RRBP1 to affect viral RNA replication. Combined  
389 with omics analysis, these data further suggest that aside from contributing to  
390 scaffolding RCs, vimentin also acts as a hub molecule to interact with and regulate  
391 various RBPs. Both functions of vimentin are important for facilitating efficient ZIKV  
392 replication and promoting infection.

393 **DISCUSSION**

394 In this study, we report the spatial-temporal rearrangement of vimentin filaments  
395 induced by ZIKV infection. Importantly, we reveal two major functions of host cell  
396 vimentin during ZIKV infection: (1) ‘organizer’, as a structural support to increase the  
397 local concentration of all necessary factors for high efficiency of viral replication; (2)  
398 ‘regulator’, by interacting with and regulating RNA-binding proteins, such as RRBP1,  
399 to facilitate viral replication. The latter is the first time that vimentin has been  
400 demonstrated to play a non-scaffold function in the context of virus infection.

401

402 **Vimentin cage formation in viral infections**

403 Viruses replicate more efficiently within the viral replication compartments (RCs), but  
404 the structural features of such a compartment remain elusive. Our current study uses  
405 ZIKV to examine this issue. ZIKV infection induces nestin, one of the intermediate  
406 filaments (IFs) in neural stem and progenitor cells, to restructure in the perinuclear  
407 region to wrap around viral dsRNA (Cortese et al. 2017). Whether vimentin IFs that  
408 expressed in most cell types with greater abundance have a role in ZIKV infection  
409 have not been explored. Taking advantage of imaging techniques, we found that ZIKV  
410 infection led to vimentin remodeling and formation of cage-like structures that  
411 surround the RCs, long after the initiation of viral RNA replication, but following  
412 more closely to viral protein production (Fig 1C,E). This kinetic association between  
413 host vimentin and viral products has been demonstrated by several lines of evidence:  
414 (1) the appearance of vimentin shrinking was approximately 16 h from the  
415 commencement of infection, coincides with the period of exponential increase of viral  
416 RNA replication (Fig 1C). (2) vimentin filaments gradually accumulated to the site of  
417 viral protein synthesis or RCs, to eventually form a whole cage (Fig 1A). (3) the cages  
418 could also be formed when cells started to synthesis new viral proteins (Fig 2A,C).  
419 Finally, (4) cage formation was not observed in cases where only EGFP vectors were  
420 expressed, or medium without live viruses was included (Fig S1F). Despite unable to  
421 prove a cause-and -effect mechanism as yet, the above data strongly suggest a link



422 between ZIKV infection and vimentin function.

423

424 In agreement with our data, vimentin rearrangement has been observed in other  
425 experimental models of infection. In cells with DENV-2 infection, vimentin has  
426 increased the interaction with viral NS4A protein, and vimentin filaments gradually  
427 moved towards the nucleus, and finally formed cage structures at around 48 hpi (Teo  
428 and Chu 2014). In SARS-CoV-2 infection, the beginning of vimentin retraction falls  
429 within the timeframe (around 6.5 hpi) of genome replication (Cortese et al. 2020).  
430 Both the time of appearance and the co-localization in the perinuclear area for the  
431 replication-assembly organelles, leading us to interpret that vimentin sensed viral  
432 replication and formed a scaffold to facilitate viral replication.

433

#### 434 **The underlying mechanisms of vimentin cage formation in viral infections**

435 Several mechanisms have been postulated for vimentin rearrangement during viral  
436 infection. One suggests that vimentin rearrangement is due to its phosphorylation on  
437 specific sites by viral infection-induced kinase activation. For example, DENV-2  
438 infection can induce Rho-associated protein kinase (ROCK) activation and  
439 phosphorylation of vimentin at serine 72 (Ser72) (Lei et al. 2013), as well as  
440 calmodulin-dependent protein kinase II (CaMKII) activation and phosphorylation of  
441 vimentin at Ser39 (Teo and Chu 2014). AFSV replication results in the activation of  
442 CaMKII and phosphorylation of vimentin at Ser83 (Stefanovic et al. 2005, Netherton  
443 and Wileman 2013). In contrast, we found the phosphorylation levels of vimentin at  
444 Ser39, Ser56, Ser83 as well as the soluble/insoluble ratio of vimentin have no  
445 significantly fluctuation during ZIKV infection (Fig S1A,B), indicating the  
446 phosphorylation mechanism for vimentin reorganization may vary among viruses, and  
447 ZIKV induced vimentin remodeling is not through phosphorylation at least on these  
448 sites nor the solubility regulation.

449

450 Aside from phosphorylation, crosslinking of neighboring vimentin subunits through

451 cysteine residue at cysteine 328 (Cys328) in response to oxidative stress can result in  
452 reorganization of vimentin network (Perez-Sala et al. 2015). Whether vimentin  
453 Cys328 plays a similar role in respond to massive virus replication remains uncertain  
454 (Ledur et al. 2020).

455

456 Another mechanism is related to the aggresome processing machinery including  
457 dynein, dynactin, and microtubules (MTs). For instance, the capsids of influenza A  
458 virus (IAV), with the help of aggresome processing machinery, can mimic misfolded  
459 protein aggregates and start uncoating in the cytoplasm (Banerjee et al. 2014).  
460 Inhibition of dynein-dependent transport by overexpression of p50 (also known as  
461 dynamitin) block the recruitment of vimentin to the microtubule organizing center  
462 (MTOC) during ASFV infection (Stefanovic et al. 2005). Nevertheless, we found that  
463 neither chemical inhibition of dynein by cilibrevin D nor inhibition of MTs by  
464 nocodazole has influenced the perinuclear aggregation of vimentin and Env protein  
465 during ZIKV infection (Fig S1D).

466

467 Overall, our results exclude the above mechanisms of vimentin reorganization during  
468 ZIKV infection, negating the role of phosphorylation modification or aggresomal  
469 machinery. Therefore, further work is needed to unravel the molecular mechanisms of  
470 vimentin filaments rearrangement in ZIKV infections.

471

472 Finally, direct interaction between viral protein and cellular vimentin may also trigger  
473 the formation of vimentin cage. For instance, human immunodeficiency virus 1  
474 (HIV-1) protease can cleave vimentin bundle and then induce accumulated  
475 perinuclear localization of vimentin filaments (Shoeman et al.1990, Shoeman et al.  
476 2001, Honer et al. 1991). In the case of DENV-2 and FMDV infections, vimentin  
477 interacts with nonstructural protein DENV-2 NS4A and FMDV 2C, respectively,  
478 concurrent with the formation of vimentin cage (Gladue et al. 2013; Teo and chu  
479 2014). Our results are more consistent with the interpretation that ZIKV proteins may

480 directly or indirectly interact with vimentin, which cooperates with other host factors,  
481 causing the formation of vimentin cage.

482

### 483 **The need of vimentin in viral infections**

484 In line with the hypothesis that the cytoskeleton cage observed in ZIKV infection  
485 might contribute to spatially concentration of different viral-induced membranous  
486 structures (Cortese et al. 2017), we demonstrated that without the cage formation after  
487 vimentin depletion, RCs are miss-organized and segregated in the cytoplasm (Fig 3A),  
488 leading to less efficient synthesis of viral components, and lower overall infection  
489 efficiency (Fig 3A,D-H; Fig 4A,B). In DENV-2 infection, the RCs become diffused  
490 throughout the cytoplasm when vimentin was knockdown by siRNA (Teo and Chu  
491 2014). Differently, we witnessed that ZIKV RCs are scattered into lumps rather than  
492 evenly diffused as in DENV-2 case, indicating a distinct dispersion feature regulated  
493 by vimentin upon ZIKV infection. Moreover, disruption of vimentin filaments by a  
494 drug Acrylamide significantly reduced the release of both bluetongue virus (BTV) and  
495 DENV-2 (Bhattacharya et al. 2007, Kanlaya et al. 2010). Treatment with Withaferin A,  
496 a compound that disrupts vimentin network, resulted in a significant reduction in  
497 SARS-CoV-2 replication and virion released (Cortese et al. 2020). Thus, it may be a  
498 common function in viral infection that vimentin cage organizes the replication  
499 structures and provides an optimal niche for the replication/translation to occur.

500

501 The decreased viral protein level within cells may be due to the reduced production or  
502 increased degradation. Vimentin has been previously shown to regulate the  
503 proteasomal degradation of HCV core protein to affect HCV production  
504 (Nitahara-Kasahara et al. 2009). In contrast, by treatment with protein synthesis and  
505 degradation inhibitors, we showed that ZIKV Env biogenesis, but not its stability, was  
506 reduced in vimentin depleted cells (Fig 4C-F). Thus, why vimentin acts differently in  
507 different viral infections remain to be determined.

508

509 **The non-structural role of vimentin in viral infections**

510 The ER is an essential cellular compartment for completion of the virus life cycle.  
511 During ZIKV replication, there is an accumulation of viral components in the ER  
512 (Mohd Ropidi et al. 2020), and viral nonstructural proteins can be incorporated into  
513 ER membrane to create invagination or protrusion vesicles for viral RNA replication  
514 (Neufeldt et al. 2018).

515

516 Since viruses cannot encode all proteins necessary for their life cycle, they usurp  
517 cellular protein biogenesis machineries such as ribosomal proteins (Campos et al.  
518 2017), RNA-binding proteins (RBPs) for viral RNA replication/transcription  
519 (Garcia-Moreno et al. 2018, Dicker et al. 2020, Diosa-Toro et al. 2020), and formation  
520 of ER membrane protein complex (EMC) (Barrows et al. 2019, Lin et al. 2019).  
521 Noncoding subgenomic flavivirus RNA (sfRNA) produced by ZIKV can interact with  
522 over 20 RBPs to regulate multiple cellular post-transcriptional processes and therefore  
523 limit effective response of these cells to viral infection (Michalski et al. 2019, Jansen  
524 et al. 2021). 464 RBPs was identified being associated with DENV or ZIKV gRNAs,  
525 including previously reported candidates (eg. heterogeneous nuclear  
526 ribonucleoproteins (hnRNPs), polyadenylate-binding protein (PABP)) that specifically  
527 associate with DENV RNA (Phillips et al. 2016, Viktorovskaya et al. 2016, Ooi et al.  
528 2019, Scaturro et al. 2019), and recently known RBPs vigilin and RRBP1 which were  
529 reported to directly bind to DENV and ZIKV RNA (Ooi et al. 2019).

530

531 In line with these discoveries, using mass spectrometry and RNA sequencing analysis,  
532 we revealed that vimentin interacts with a large number of RBPs and ribosomal  
533 proteins to regulate cellular transcription and translation, enabling efficient ZIKV  
534 replication (Fig 5A-F). Considering the interplay between cytoskeleton and ER  
535 membrane (Terasaki et al. 1986, Risco et al. 2002, Gurel et al. 2014, Zhang 2020), it  
536 is tempting to speculate that virus-induced vimentin cage not only provides physical  
537 space for viral RCs accumulation, but equally important, interacts with molecules

538 involved in cellular transcription and translation process and thus promotes the  
539 efficiency of virus replication from perspectives of both physical support and  
540 functional control.

541

#### 542 **The interaction between vimentin and RRBP1**

543 Among the numerous candidates, we focused on the interaction between vimentin and  
544 RRBP1, a positively charged membrane-bound protein found in rough ER (Cui et al.  
545 2012), because: (1) RRBP1 was identified as the top candidates in both mass  
546 spectrometry and RNA sequencing examinations. (2) RRBP1 could directly bind viral  
547 RNA and play pronounced role during DENV and ZIKV infection (Ooi et al. 2019).

548

549 A previous study has identified that RRBP1 could mediate the interaction between ER  
550 and MTs via the novel MT-binding and -bundling domain MTB-1 of coiled-coil  
551 region of RRBP1 (Ogawa-Goto et al. 2007). Overexpression of MTB-1 induced  
552 acetylated MTs and promoted MT bundling (Ogawa-Goto et al. 2007). Moreover,  
553 RRBP1 also regulates ER organization and controls axon specification by regulating  
554 local MTs remodeling (Farias et al. 2019). Aside from the interplay with MTs, our  
555 data demonstrate that RRBP1 colocalizes with ZIKV dsRNA, and knockdown of  
556 RRBP1 in wild-type cells reduces ZIKV RNA replication (Fig 6C,H).

557

558 Significantly, our results are the first to identify that vimentin can directly bind to  
559 RRBP1 and influence its cellular localization and expression level in both  
560 mock-infected and ZIKV infected cells. This represents an improved understanding of  
561 the interplay between cytoskeletal IFs and ER proteins, especially in the context of  
562 virus infection. Of note, RRBP1 depletion has less effect on viral replication than that  
563 of vimentin depletion (Fig 6H,I), and RRBP1 expression has no significant influence  
564 on the cellular distribution, mRNA and protein expression of vimentin, indicating  
565 RRBP1 acts through vimentin during ZIKV infection. Further investigation is needed  
566 to determine whether other RNA-binding proteins may cooperate with vimentin to

567 modulate ZIKV replication. Identification of these factors not only benefits the  
568 characterization of the biogenesis of ZIKV RCs, but also provides potential  
569 candidates for developing broad spectrum compounds that restrict viral replication.

570

## 571 **MATERIA AND METHODS**

### 572 **Cell culture and virus**

573 Hepatoma Huh7 cells, human osteosarcoma (U2OS) cells and African green monkey  
574 kidney epithelial Vero cells were cultured at 37 °C with 5% CO<sub>2</sub> in Dulbecco's  
575 modified Eagle's medium (DMEM) (Biological Industries) supplemented with 10%  
576 fetal bovine serum (FBS) (Gibco), 1% penicillin and streptomycin. C6/36 cells were  
577 cultured in minimum essential medium (MEM) (Gibco) supplemented with 10% FBS  
578 and 2% non-essential amino acids (Solarbio, N1250-100) at 28 °C in 5% CO<sub>2</sub>. ZIKV  
579 strain SZ01 was used in this study (GneBank: KU866423.2). Virus stocks were  
580 prepared by virus amplification in C6/36 cells at a multiplicity of infection (MOI) of  
581 0.1. Virus-containing supernatant medium were harvested from day 4 post infection  
582 and stored at -80 °C. For lentivirus production, the pLKO.1 shRNA plasmid was  
583 transfected into HEK293T cells together with psPAX2 packaging plasmid (Addgene  
584 #12260) and pMD2.G envelop plasmid (Addgene #12259) by using FuGENE HD  
585 (Promega). Supernatants were collected 48 hours post-transfection, filtered through a  
586 0.45 µm filter to remove the cells debris and stored at -80 °C. The effectiveness of  
587 knockdown of target gene was assessed by qRT-PCR and western blotting.

588

### 589 **Plasmids and transfection**

590 Constructs expressing mCherry-tagged full-length vimentin and GFP-tagged 'unit  
591 length filament' (ULF) vimentin were kind gifts from John Eriksson (University of  
592 Turku and Abo Akademi University, Finland). Plasmids encoding ZIKV envelop was  
593 amplified by reverse transcription-PCR (RT-PCR) and cloned into the pEGFP-N1  
594 vector. All constructs were verified by DNA sequencing. The PCR primers used in  
595 this study are summarized in Table S3. Transfection of plasmids at indicated  
596 concentrations were performed using jetPRIME transfection reagent (#114-15)  
597 following the manufacturer's instructions.

598

### 599 **Vimentin CRISPR knockout cell line generation**

600 As previous, vimentin-knockout cells were generated using CRISPR/Cas9 methods  
601 (Jiu et al. 2015) based on pSpCas9 (BB)-2A-GFP vector (Addgene #48138) with two  
602 targets. Primers for vimentin target 1 were  
603 5'-CACCGTGGACGTAGTCACGTAGCTC-3' and  
604 5'-AAACGAGCTACGTGACTACGTCCAC-3'. Primers for vimentin target 2 were  
605 5'-CACCGCAACGACAAAGCCCGCGTCCG-3' and 5'-  
606 AAACCGACGCGGGCTTTGTCTGTTGC-3'. Transfected cells were detached at 24 h  
607 post-transfection and sorted with FACS Aria II (BD Biosciences) using low intensity  
608 GFP-expression pass gating, and then cells were plated onto 96-well plate  
609 supplemented DMEM containing 20% FBS and 10 mM HEPES with single cell/well.  
610 CRISPR clones were cultivated for two weeks prior selecting clones with no  
611 discernible vimentin protein expression by western blotting.

612

### 613 **Immunofluorescence microscopy**

614 Cells cultured on glass slides (VWR, #631-0150) were fixed in 4% paraformaldehyde  
615 (PFA) for 15 min at room temperature (RT), and permeabilized with 0.1% Triton  
616 X-100 in PBS for 5 min. Cells were then blocked in PBS supplemented with 5%  
617 bovine serum albumin (BSA) (ABCONE, #A23088). Both primary and  
618 fluorescent-conjugated secondary antibodies were applied onto cells and incubated at  
619 RT for 1 h. Cells were mounted in DAPI Fluoromount-G reagent (SountherBiotech,  
620 0100-20) and imaged using either Olympus spinSR10 Ixplorer spinning disk confocal  
621 microscope or GE DeltaVision OMX SR super-resolved structured illumination  
622 microscope. The following primary antibodies were used: vimentin rabbit monoclonal  
623 D21H3 antibody (dilution 1:100; #5741, Cell Signaling); vimentin chicken polyclonal  
624 antibody (dilution 1:1000; #ab24525, Abcam); tubulin mouse monoclonal antibody  
625 (dilution 1:200; #4026, Sigma); ribosome-binding protein 1 (RRBP1) rabbit  
626 polyclonal antibody (dilution 1:100; #A303-996A, Bethyl Laboratories); Zika virus  
627 envelop mouse monoclonal antibody (dilution 1:1000; #1176-46, BioFront); Zika  
628 virus NS4B rabbit polyclonal antibody (dilution 1:1000; #GTX133311, Genetex);



629 Zika virus NS1 mouse monoclonal antibody (dilution 1:1000; #1225-06, BioFront);  
630 dsRNA monoclonal antibody (dilution 1:500; #J2-1909, SCICONS). The following  
631 secondary antibodies were used: Alexa Fluor 488 goat anti-rabbit IgG (H+L) (dilution  
632 1:1000; #A11008, Invitrogen); Alexa Fluor 568 goat anti-rabbit IgG (H+L) (dilution  
633 1:1000; #A11011, Invitrogen); Alexa Fluor 488 goat anti-mouse IgG (H+L) (dilution  
634 1:1000; #A11001, Invitrogen); Alexa Fluor 555 goat anti-mouse IgG (H+L) (dilution  
635 1:1000; #A21422, Invitrogen). F-actin was stained by Alexa Fluor 647 phalloidin  
636 (dilution 1:500; #A22287, Invitrogen).

637

### 638 **Live cell imaging**

639 Cells were seeded into 35 mm-diameter glass bottom culture dish (MatTek  
640 Corporation) pre-coated by fibronectin ( $1.5 \mu\text{g}/\text{cm}^2$ ) (Sigma-Aldrich, F2006). Cells  
641 were then infected with ZIKV (MOI=5 pfu per cell) for 2 h at 37°C. After removing  
642 the inoculum, 2 mL DMEM containing 2% FBS was added for imaging. Alternatively,  
643 cells were transfected with ZIKV-E-EGFP for 20 h before imaging. Image series were  
644 acquired on an Olympus spinSR10 Ixprove spinning disk confocal microscope using a  
645 100× U plan apochromat high resolution objective with NA=1.5, with time interval of  
646 10 min for 40 h in infection experiments and 13 s for 1.5 h in transfection experiments,  
647 respectively. For figure 2C, vimentin knockout cells were co-transfected with  
648 ZIKV-E-EGFP and vimentin-mCherry plasmids for 24 h, and image series were  
649 acquired on GE DeltaVision widefield microscope using 60× UPlanXApo objective  
650 with NA=1.42. Image acquisition was performed at time interval of 30 min for 12 h.  
651 All live cell imaging data were further analyzed by Imaris 9.2 (Bitplane, Zurich,  
652 Switzerland) and ImageJ software.

653

### 654 **Western blotting**

655 Cells were washed two times with PBS and lysed in RIPA lysis buffer (Beyotime,  
656 #P0013B) with protease and phosphatase inhibitors (Beyotime, #P1045). Protein  
657 concentration were measured by BCA (Beyotime, #P0010), adjusted with PBS and

658 6X SDS-sample buffer (Beyotime, #P0015F), and subjected to SDS-PAGE. 5%  
659 non-fat milk (BD Difco, #8011939) was used in blocking and PVDF membrane  
660 (Millipore, #IPVH00010) was washed by TBST buffer (Tris-buffered saline, 0.1%  
661 Tween20). Antibodies were used with the following dilutions in primary antibody  
662 dilution buffer (Beyotime, P0023A): vimentin rabbit monoclonal D21H3 antibody  
663 (dilution 1:1000; #5741, Cell signaling); phospho-vimentin (Ser39) rabbit antibody  
664 (dilution 1:1000; #13614S, CST); phospho-vimentin (Ser56) rabbit antibody (dilution  
665 1:1000; #3877S, CST); phospho-vimentin (Ser83) (D5A2D) rabbit antibody (dilution  
666 1:1000; #12569S, CST);  $\beta$ -tubulin mouse monoclonal antibody (dilution 1:1000;  
667 #T4026, Sigma);  $\beta$ -actin mouse monoclonal antibody (dilution 1:1000; #A5441,  
668 Sigma); Zika virus envelop mouse monoclonal antibody (dilution 1:5000; #1176-46,  
669 BioFront); ribosome-binding protein 1 (RRBP1) rabbit polyclonal antibody (dilution  
670 1:1000; #A303-996A, Bethyl Laboratories); green fluorescent protein (GFP) mouse  
671 monoclonal antibody (dilution 1:1000; #G6795, Sigma); p21 Waf1/Cip1 (12D1)  
672 rabbit monoclonal antibody (dilution 1:1000; #2947, CST); LC3C (D3O6P) rabbit  
673 monoclonal antibody (dilution 1:1000; #14736, CST); GAPDH rabbit monoclonal  
674 antibody (dilution 1:5000; #G8795, Sigma). Horseradish peroxidase (HRP)-linked  
675 anti-mouse IgG antibody (dilution 1:5000; #7076V, CST) and HRP-linked anti-rabbit  
676 IgG antibody (dilution 1:5000; #7074V, CST) were used and chemiluminescence was  
677 measured after using western blotting ECL (Tanon, #180-501). The band intensities of  
678 blots were measured by ImageJ software. For quantification, the intensities of  
679 interested proteins were normalized with the internal control GAPDH, and mock  
680 infected cells were set to 1 in each experiment.

681

### 682 **Real-time RT-PCR**

683 Total cellular RNA was extracted by EZ-press RNA Purification Kit (EZBioscience,  
684 #B0004DP) according to the manufacturer's protocols. Total RNA was reverse  
685 transcribed by using Color Reverse Transcription Kit (EZBioscience, #A0010CGQ).  
686 Real-time RT-PCR was carried out by using 2 $\times$  Color SYBR Green qPCR Master

687 Mix (ROX2 plus) (EZBioscience, #A0012-R2) in QuantStudio 1 system (Thermo).  
688 All readings were normalized to the level of GAPDH. The primers used for real-time  
689 RT-PCR are shown in Table S1.

690

#### 691 **Plaque assay**

692 Zika virus titers were determined by plaque assay performed on Vero cells. Briefly,  
693 Vero cells were seeded into 24 well plates at a density of  $1 \times 10^5$  cells/well and washed  
694 with pre-warmed phosphate-buffered saline (PBS). Cells were then infected with  
695 serial 10-fold dilutions of virus supernatants for 2 h at 37 °C with 5% CO<sub>2</sub>. Inoculum  
696 was removed and replaced with DMEM containing 1% carboxymethylcellulose  
697 (CMC) (Sigma, #C5678) and 1.5% FBS. After four days post-infection, cells were  
698 washed with PBS and fixed with 4% PFA at RT for 1 h, followed by staining with  
699 crystal violet (Beyotime, C0121) for 10 min. After rinsing with water, the number of  
700 visible plaques was counted, and the virus titers were shown as plaque forming units  
701 (PFU) per milliliter.

702

#### 703 **Pull-down assay**

704 For preparing the medium, Ni Sepharose 6 Fast Flow (Sigma-Aldrich, GE17-5318-01)  
705 was sedimented by centrifugation at 500×g for 5 min, then washed with distilled  
706 water and binding buffer (20 mM sodium phosphate, 0.5 M NaCl, 20 mM imidazole,  
707 pH 7.4, filtration through a 0.45 μm filter) for twice, and further resuspended with an  
708 appropriate volume of binding buffer to make a 50% slurry. For binding the sample, 5  
709 μg of His-tagged recombinant vimentin (Sino Biologicals, #10028-H08B) were  
710 incubated with 10 μL of the 50% slurry at 4 °C on a shaker with low speed for 3 h.  
711 Beads were spun down by centrifugation at 500×g for 5 min and washed with cold  
712 binding buffer, then incubated with 1000 μg of filtered whole-cell lysates in 1×  
713 Lysis/Binding/Wash buffer (Cell signaling, #11524S) at 4 °C on a rotator with low  
714 speed overnight. For elution, Beads were spun down and washed with cold binding  
715 buffer for three times, then incubated with cold elution buffer (20 mM sodium

716 phosphate, 0.5 M NaCl, 500 mM imidazole, pH 7.4, filtration through a 0.45  $\mu$ m filter)  
717 at 4 °C on a shaker at low speed overnight. The supernatant was boiled in SDS loading  
718 buffer (Beyotime, #P0015F) and subjected to SDS-PAGE, followed by western  
719 blotting.

720

### 721 **Mass spectrometry**

722 Cells were lysed with NP40 buffer (50mM pH8.0 Tris-HCl; 150mM NaCl; 0.5%NP40;  
723 1mM EDTA; protease Inhibitor) on ice for 15 min. Scrape cells and harvest the  
724 supernatant by centrifuge at 13,000 rpm for 10 min at 4 °C. Then proceed  
725 immunoprecipitation according to the protocol of Dynabeads Protein G (Thermo  
726 Fisher, #10004D). Briefly, incubate Dynabeads Protein G with anti-vimentin antibody  
727 (Abcam, #ab137321) with rotation for 30 min at RT. Place the tube with  
728 Dynabeads-Ab complex on the magnet to remove the supernatant. Then add the cell  
729 supernatant and incubate with rotation for 30 min at RT or overnight at 4 °C to allow  
730 antigen to bind to the beads-Ab complex. Wash the Dynabeads-Ab-Ag complex 3  
731 times. Then elute target antigen with SDT buffer (4%SDS; 100mM pH8.0 Tris-HCl;  
732 1mM DTT) for further Mass spectrum analyses by Q Exactive (Thermo Fisher).

733

### 734 **RNA Sequencing and transcriptome analysis**

735 RNA was extracted from U2OS WT or vimentin KO cells after infection with ZIKV  
736 (MOI=1) for 24 h, using TRIzol™ Reagent (Invitrogen, #15596026) according to the  
737 manufacturer's instruction. Libraries of RNAs were constructed using Illumina  
738 Truseq™ RNA sample prep Kit (Illumina) with the manufacturer's instruction.  
739 Illumina HiSeq 2000 was used to sequence the library and FastQC v0.11.4 (Andrews  
740 2010) was utilized to evaluate the quality of the raw reads. Adapters were removed by  
741 Cutadapt v1.16 (Martin 2011) and the same software we used to filter the reads with  
742 low quality (Q < 20) or short length (< 25 bp). Hisat2 v 2.1.0 (Kim et al. 2019) was  
743 used to map the clean reads on human genome (GRCh38). StringTie v 1.1.3b (Pertea  
744 et al. 2016) and GRCh38 GTF file (version 92) were used to obtain the counts of

745 genes and edgeR v 3.24 (McCarthy et al. 2012, Robinson et al. 2010) was used to  
746 perform the analysis of differential gene expression analysis. FPKM of each gene was  
747 calculated and different expression genes which  $|\log_2\text{FoldChange}| > 1$  and adjust  
748 P-value  $< 0.05$  were selected. Volcano plot and Heat map were generated using  
749 TBtools (Chen et al. 2020).

750

### 751 **GO enrichment analysis**

752 Gene ontology analysis was performed by using the Database for Annotation,  
753 Visualization and Integrated Discovery (DAVID) Bioinformatics Resources 6.8  
754 (<https://david.ncifcrf.gov/home.jsp>) (Huang da et al. 2009). The molecular function,  
755 biological process and cellular component of tested genes were analyzed. Significance  
756 was defined as adjust P-value (Padj) less than 0.05. The results were presented with  
757 bubble plots drawn by R with gglpot2 package (Wickham 2016).

758

### 759 **Transmission electron microscopy**

760 Cells were seeded on ACLAR films treated with poly-lysine (100 ug/mL), infected  
761 with ZIKV (MOI=5) for 24 h, and fixed in 2.5% glutaraldehyde in PBS with a pH of  
762 7.4 at room temperature for 1 hour. Samples were then post-fixed with 1% osmium  
763 tetroxide in 0.1 mol/L sodium cacodylate for 1.5 h, and stained with 2% (w/v) uranyl  
764 acetate in double distilled water for 50 min to increase the contrast. After washing and  
765 dehydration in a graded series of acetone, samples were embedded in Embed 812  
766 resin. The embedded samples were sliced into 70 nm sections using a Leica  
767 ultramicrotome EM UC6 (Leica, Germany) and sections were collected on the EM  
768 grids. Sample grids were imaged under a spirit transmission electron microscope (FEI  
769 Company, The Netherlands) operating at 100 Kv.

770

### 771 **Statistical analysis**

772 Statistical analysis was performed by unpaired Student's *t* test, one-way analysis of  
773 variance or two-way ANOVA using the GraphPad Prism v8 software and p values

774 were indicated by \* $p < 0.05$ , or \*\* $p < 0.01$ , or \*\*\* $p < 0.001$ . The histogram data were  
775 presented as mean  $\pm$  SEM.

776

## 777 **ACKNOWLEDGMENTS**

778 We would like to thank John E. Eriksson (University of Turku and Åbo Akademi  
779 University, Finland) for providing us the vimentin plasmids, Lan Bao (Chinese  
780 Academy of Science, China) and Xueliang Zhu (Chinese Academy of Science, China)  
781 for insightful discussion.

782

## 783 **Funding**

784 This study was supported by National Natural Science Foundation of China  
785 (92054104, 31970660); Shanghai Municipal Science and Technology Major Project  
786 (2019SHZDZX02); Key Laboratory of Molecular Virology & Immunology, Institut  
787 Pasteur of Shanghai (KLMVI-OP-202001); “100 talents program” from the Chinese  
788 Academy of Sciences; and the Strategic Priority Research Program of the Chinese  
789 Academy of Sciences (XDA13010500).

790

## 791 **AUTHOR CONTRIBUTIONS**

792 Y.J. and X.J. designed and supervised the study. Y.Z. carried out experiments and  
793 interpretation of the data. Y.X. and F.F. performed the electronic microscopy. J.C. and  
794 Y.L. performed the RNA-Seq experiment. S.Z. performed the Mass Spectrometry  
795 experiment. Y.J., X.J. and Y.Z. wrote the manuscript with contributions from all other  
796 authors.

797

## 798 **DECLARATION OF INTERESTS**

799 The authors declare no competing interests.

800 **REFERENCES**

- 801 **Andrews, S.** (2010). "FastQC: A Quality Control Tool for High Throughput Sequence  
802 Data."
- 803 **Banerjee, I., Y. Miyake, S. P. Nobs, C. Schneider, P. Horvath, M. Kopf, P.  
804 Matthias, A. Helenius and Y. Yamauchi** (2014). "Influenza A virus uses the  
805 aggresome processing machinery for host cell entry." *Science* **346**(6208): 473-477.
- 806 **Barrows, N. J., Y. Anglero-Rodriguez, B. Kim, S. F. Jamison, C. Le Sommer, C. E.  
807 McGee, J. L. Pearson, G. Dimopoulos, M. Ascano, S. S. Bradrick, et al.** (2019).  
808 "Dual roles for the ER membrane protein complex in flavivirus infection: viral entry  
809 and protein biogenesis." *Sci Rep* **9**(1): 9711.
- 810 **Bhattacharya, B., R. J. Noad and P. Roy** (2007). "Interaction between Bluetongue  
811 virus outer capsid protein VP2 and vimentin is necessary for virus egress." *Viol J* **4**:  
812 7.
- 813 **Caldas, L. A., R. C. Azevedo, J. L. da Silva and W. de Souza** (2020). "Microscopy  
814 analysis of Zika virus morphogenesis in mammalian cells." *Sci Rep* **10**(1): 8370.
- 815 **Campos, R. K., B. Wong, X. Xie, Y. F. Lu, P. Y. Shi, J. Pompon, M. A.  
816 Garcia-Blanco and S. S. Bradrick** (2017). "RPLP1 and RPLP2 Are Essential  
817 Flavivirus Host Factors That Promote Early Viral Protein Accumulation." *J Virol*  
818 **91**(4).
- 819 **Cao-Lormeau, V. M., A. Blake, S. Mons, S. Lastere, C. Roche, J. Vanhomwegen,  
820 T. Dub, L. Baudouin, A. Teissier, P. Larre, et al.** (2016). "Guillain-Barre Syndrome  
821 outbreak associated with Zika virus infection in French Polynesia: a case-control  
822 study." *Lancet* **387**(10027): 1531-1539.
- 823 **Chen, C., H. Chen, Y. Zhang, H. R. Thomas, M. H. Frank, Y. He and R. Xia**  
824 (2020). "TBtools: An Integrative Toolkit Developed for Interactive Analyses of Big  
825 Biological Data." *Mol Plant* **13**(8): 1194-1202.
- 826 **Cortese, M., S. Goellner, E. G. Acosta, C. J. Neufeldt, O. Oleksiuk, M. Lampe, U.  
827 Haselmann, C. Funaya, N. Schieber, P. Ronchi, et al.** (2017). "Ultrastructural  
828 Characterization of Zika Virus Replication Factories." *Cell Rep* **18**(9): 2113-2123.
- 829 **Cortese, M., J. Y. Lee, B. Cerikan, C. J. Neufeldt, V. M. J. Oorschot, S. Kohrer, J.  
830 Hennies, N. L. Schieber, P. Ronchi, G. Mizzon, et al.** (2020). "Integrative Imaging  
831 Reveals SARS-CoV-2-Induced Reshaping of Subcellular Morphologies." *Cell Host*  
832 *Microbe* **28**(6): 853-866 e855.
- 833 **Cui, X. A., H. Zhang and A. F. Palazzo** (2012). "p180 promotes the  
834 ribosome-independent localization of a subset of mRNA to the endoplasmic  
835 reticulum." *PLoS Biol* **10**(5): e1001336.
- 836 **Danielsson, F., M. K. Peterson, H. Caldeira Araujo, F. Lautenschlager and A. K.  
837 B. Gad** (2018). "Vimentin Diversity in Health and Disease." *Cells* **7**(10).
- 838 **Defer, C., M. T. Belin, M. L. Caillet-Boudin and P. Boulanger** (1990). "Human  
839 adenovirus-host cell interactions: comparative study with members of subgroups B  
840 and C." *J Virol* **64**(8): 3661-3673.
- 841 **Denes, C. E., M. Miranda-Saksena, A. L. Cunningham and R. J. Diefenbach**  
842 (2018). "Cytoskeletons in the Closet-Subversion in Alphaherpesvirus Infections."  
843 *Viruses* **10**(2).



- 844 **Dicker, K., A. I. Jarvelin, M. Garcia-Moreno and A. Castello** (2020). "The  
845 importance of virion-incorporated cellular RNA-Binding Proteins in viral particle  
846 assembly and infectivity." *Semin Cell Dev Biol*.
- 847 **Diosa-Toro, M., K. R. Prasanth, S. S. Bradrick and M. A. Garcia Blanco** (2020).  
848 "Role of RNA-binding proteins during the late stages of Flavivirus replication cycle."  
849 *Virology* **17**(1): 60.
- 850 **Dohner, K. and B. Sodeik** (2005). "The role of the cytoskeleton during viral  
851 infection." *Curr Top Microbiol Immunol* **285**: 67-108.
- 852 **Farias, G. G., A. Freal, E. Tortosa, R. Stucchi, X. Pan, S. Portegies, L. Will, M.**  
853 **Altelaar and C. C. Hoogenraad** (2019). "Feedback-Driven Mechanisms between  
854 Microtubules and the Endoplasmic Reticulum Instruct Neuronal Polarity." *Neuron*  
855 **102**(1): 184-201 e188.
- 856 **Foo, K. Y. and H. Y. Chee** (2015). "Interaction between Flavivirus and Cytoskeleton  
857 during Virus Replication." *Biomed Res Int* **2015**: 427814.
- 858 **Garcia-Moreno, M., A. I. Jarvelin and A. Castello** (2018). "Unconventional  
859 RNA-binding proteins step into the virus-host battlefield." *Wiley Interdiscip Rev RNA*  
860 **9**(6): e1498.
- 861 **Gladue, D. P., V. O'Donnell, R. Baker-Branstetter, L. G. Holinka, J. M. Pacheco,**  
862 **I. Fernandez Sainz, Z. Lu, X. Ambroggio, L. Rodriguez and M. V. Borca** (2013).  
863 "Foot-and-mouth disease virus modulates cellular vimentin for virus survival." *J Virol*  
864 **87**(12): 6794-6803.
- 865 **Gurel, P. S., A. L. Hatch and H. N. Higgs** (2014). "Connecting the cytoskeleton to  
866 the endoplasmic reticulum and Golgi." *Curr Biol* **24**(14): R660-R672.
- 867 **Hackett, B. A., M. Dittmar, E. Segrist, N. Pittenger, J. To, T. Griesman, B.**  
868 **Gordesky-Gold, D. C. Schultz and S. Cherry** (2019). "Sirtuin Inhibitors Are  
869 Broadly Antiviral against Arboviruses." *mBio* **10**(4).
- 870 **Hamill, D., J. Davis, J. Drawbridge and K. A. Suprenant** (1994). "Polyribosome  
871 targeting to microtubules: enrichment of specific mRNAs in a reconstituted  
872 microtubule preparation from sea urchin embryos." *J Cell Biol* **127**(4): 973-984.
- 873 **Honer, B., R. L. Shoeman and P. Traub** (1991). "Human immunodeficiency virus  
874 type 1 protease microinjected into cultured human skin fibroblasts cleaves vimentin  
875 and affects cytoskeletal and nuclear architecture." *J Cell Sci* **100** ( Pt 4): 799-807.
- 876 **Huang da, W., B. T. Sherman and R. A. Lempicki** (2009). "Systematic and  
877 integrative analysis of large gene lists using DAVID bioinformatics resources." *Nat*  
878 *Protoc* **4**(1): 44-57.
- 879 **Inagaki, M., Y. Nishi, K. Nishizawa, M. Matsuyama and C. Sato** (1987).  
880 "Site-specific phosphorylation induces disassembly of vimentin filaments in vitro."  
881 *Nature* **328**(6131): 649-652.
- 882 **Jansen, S., E. Smlatic, D. Copmans, S. Debaveye, F. Tangy, P. O. Vidalain, J.**  
883 **Neyts and K. Dallmeier** (2021). "Identification of host factors binding to dengue and  
884 Zika virus subgenomic RNA by efficient yeast three-hybrid screens of the human  
885 ORFeome." *RNA Biol*: 1-13.
- 886 **Jiu, Y., Lehtimäki, J., Tojkander, S., Cheng, F., Jaalinoja, H., Liu, X., Varjosalo,**  
887 **M., Eriksson, J.E. and Lappalainen, P** (2015). "Bidirectional interplay between



888 vimentin intermediate filaments and contractile actin stress fibers." *Cell Rep*  
889 **11**(10):1511-1518.

890 **Kanlaya, R., S. N. Pattanakitsakul, S. Sinchaikul, S. T. Chen and V.**  
891 **Thongboonkerd** (2010). "Vimentin interacts with heterogeneous nuclear  
892 ribonucleoproteins and dengue nonstructural protein 1 and is important for viral  
893 replication and release." *Mol Biosyst* **6**(5): 795-806.

894 **Kim, D., J. M. Paggi, C. Park, C. Bennett and S. L. Salzberg** (2019). "Graph-based  
895 genome alignment and genotyping with HISAT2 and HISAT-genotype." *Nat*  
896 *Biotechnol* **37**(8): 907-915.

897 **Kim, S. and P. A. Coulombe** (2010). "Emerging role for the cytoskeleton as an  
898 organizer and regulator of translation." *Nat Rev Mol Cell Biol* **11**(1): 75-81.

899 **Kim, S., J. Kellner, C. H. Lee and P. A. Coulombe** (2007). "Interaction between the  
900 keratin cytoskeleton and eEF1Bgamma affects protein synthesis in epithelial cells."  
901 *Nat Struct Mol Biol* **14**(10): 982-983.

902 **Ledur, P. F., K. Karmirian, C. Pedrosa, L. R. Q. Souza, G. Assis-de-Lemos, T. M.**  
903 **Martins, J. Ferreira, G. F. de Azevedo Reis, E. S. Silva, D. Silva, et al.** (2020).  
904 "Zika virus infection leads to mitochondrial failure, oxidative stress and DNA damage  
905 in human iPSC-derived astrocytes." *Sci Rep* **10**(1): 1218.

906 **McCarthy, D. J., Y. Chen and G. K. Smyth** (2012). "Differential expression  
907 analysis of multifactor RNA-Seq experiments with respect to biological variation."  
908 *Nucleic Acids Res* **40**(10): 4288-4297.

909 **Lee, I., S. Bos, G. Li, S. Wang, G. Gadea, P. Despres and R. Y. Zhao** (2018).  
910 "Probing Molecular Insights into Zika Virus(-)Host Interactions." *Viruses* **10**(5).

911 **Lei, S., Y. P. Tian, W. D. Xiao, S. Li, X. C. Rao, J. L. Zhang, J. Yang, X. M. Hu**  
912 **and W. Chen** (2013). "ROCK is involved in vimentin phosphorylation and  
913 rearrangement induced by dengue virus." *Cell Biochem Biophys* **67**(3): 1333-1342.

914 **Lin, D. L., T. Inoue, Y. J. Chen, A. Chang, B. Tsai and A. W. Tai** (2019). "The ER  
915 Membrane Protein Complex Promotes Biogenesis of Dengue and Zika Virus  
916 Non-structural Multi-pass Transmembrane Proteins to Support Infection." *Cell Rep*  
917 **27**(6): 1666-1674 e1664.

918 **Lowery, J., E. R. Kuczmarski, H. Herrmann and R. D. Goldman** (2015).  
919 "Intermediate Filaments Play a Pivotal Role in Regulating Cell Architecture and  
920 Function." *J Biol Chem* **290**(28): 17145-17153.

921 **Ma, X., Y. Ling, P. Li, P. Sun, Y. Cao, X. Bai, K. Li, Y. Fu, J. Zhang, D. Li, et al.**  
922 (2020). "Cellular Vimentin Interacts with Foot-and-Mouth Disease Virus  
923 Nonstructural Protein 3A and Negatively Modulates Viral Replication." *J Virol*  
924 **94**(16).

925 **Matilainen, J.** (2016). "The activation of aggresomal pathway in Coxsackievirus B3  
926 infection."

927 **Medalia, O., I. Weber, A. S. Frangakis, D. Nicastro, G. Gerisch and W.**  
928 **Baumeister** (2002). "Macromolecular architecture in eukaryotic cells visualized by  
929 cryoelectron tomography." *Science* **298**(5596): 1209-1213.

930 **Michalski, D., J. G. Ontiveros, J. Russo, P. A. Charley, J. R. Anderson, A. M.**  
931 **Heck, B. J. Geiss and J. Wilusz** (2019). "Zika virus noncoding sRNAs sequester

932 multiple host-derived RNA-binding proteins and modulate mRNA decay and splicing  
933 during infection." *J Biol Chem* **294**(44): 16282-16296.

934 **Mohd Ropidi, M. I., A. S. Khazali, N. Nor Rashid and R. Yusof** (2020).  
935 "Endoplasmic reticulum: a focal point of Zika virus infection." *J Biomed Sci* **27**(1):  
936 27.

937 **Munjal, A., R. Khandia, K. Dhama, S. Sachan, K. Karthik, R. Tiwari, Y. S. Malik,**  
938 **D. Kumar, R. K. Singh, H. M. N. Iqbal, et al.** (2017). "Advances in Developing  
939 Therapies to Combat Zika Virus: Current Knowledge and Future Perspectives." *Front*  
940 *Microbiol* **8**: 1469.

941 **Murti, K. G., R. Goorha and M. W. Klymkowsky** (1988). "A functional role for  
942 intermediate filaments in the formation of frog virus 3 assembly sites." *Virology*  
943 **162**(1): 264-269.

944 **Musso, D. and D. J. Gubler** (2016). "Zika Virus." *Clin Microbiol Rev* **29**(3):  
945 487-524.

946 **Netherton, C. L. and T. E. Wileman** (2013). "African swine fever virus organelle  
947 rearrangements." *Virus Res* **173**(1): 76-86.

948 **Neufeldt, C. J., M. Cortese, E. G. Acosta and R. Bartenschlager** (2018). "Rewiring  
949 cellular networks by members of the Flaviviridae family." *Nat Rev Microbiol* **16**(3):  
950 125-142.

951 **Nie, Y., L. Hui, M. Guo, W. Yang, R. Huang, J. Chen, X. Wen, M. Zhao and Y.**  
952 **Wu** (2021). "Rearrangement of Actin Cytoskeleton by Zika Virus Infection Facilitates  
953 Blood-Testis Barrier Hyperpermeability." *Virol Sin.*

954 **Nitahara-Kasahara, Y., M. Fukasawa, F. Shinkai-Ouchi, S. Sato, T. Suzuki, K.**  
955 **Murakami, T. Wakita, K. Hanada, T. Miyamura and M. Nishijima** (2009).  
956 "Cellular vimentin content regulates the protein level of hepatitis C virus core protein  
957 and the hepatitis C virus production in cultured cells." *Virology* **383**(2): 319-327.

958 **Ogawa-Goto, K., K. Tanaka, T. Ueno, K. Tanaka, T. Kurata, T. Sata and S. Irie**  
959 (2007). "p180 is involved in the interaction between the endoplasmic reticulum and  
960 microtubules through a novel microtubule-binding and bundling domain." *Mol Biol*  
961 *Cell* **18**(10): 3741-3751.

962 **Ooi, Y. S., K. Majzoub, R. A. Flynn, M. A. Mata, J. Diep, J. K. Li, N. van Buuren,**  
963 **N. Rumachik, A. G. Johnson, A. S. Puschnik, et al.** (2019). "An RNA-centric  
964 dissection of host complexes controlling flavivirus infection." *Nat Microbiol* **4**(12):  
965 2369-2382.

966 **Pagani, I., S. Ghezzi, A. Ulisse, A. Rubio, F. Turrini, E. Garavaglia, M. Candiani,**  
967 **C. Castilletti, G. Ippolito, G. Poli, et al.** (2017). "Human Endometrial Stromal Cells  
968 Are Highly Permissive To Productive Infection by Zika Virus." *Sci Rep* **7**: 44286.

969 **Perez-Sala, D., C. L. Oeste, A. E. Martinez, M. J. Carrasco, B. Garzon and F. J.**  
970 **Canada** (2015). "Vimentin filament organization and stress sensing depend on its  
971 single cysteine residue and zinc binding." *Nat Commun* **6**: 7287.

972 **Pertea, M., D. Kim, G. M. Pertea, J. T. Leek and S. L. Salzberg** (2016).  
973 "Transcript-level expression analysis of RNA-seq experiments with HISAT, StringTie  
974 and Ballgown." *Nat Protoc* **11**(9): 1650-1667.

975 **Phillips, S. L., E. J. Soderblom, S. S. Bradrick and M. A. Garcia-Blanco** (2016).

- 976 "Identification of Proteins Bound to Dengue Viral RNA In Vivo Reveals New Host  
977 Proteins Important for Virus Replication." *mBio* **7**(1): e01865-01815.
- 978 **Pierson, T. C. and M. S. Diamond** (2018). "The emergence of Zika virus and its new  
979 clinical syndromes." *Nature* **560**(7720): 573-581.
- 980 **Pierson, T. C. and B. S. Graham** (2016). "Zika Virus: Immunity and Vaccine  
981 Development." *Cell* **167**(3): 625-631.
- 982 **Ramos, I., K. Stamatakis, C. L. Oeste and D. Perez-Sala** (2020). "Vimentin as a  
983 Multifaceted Player and Potential Therapeutic Target in Viral Infections." *Int J Mol*  
984 *Sci* **21**(13).
- 985 **Rasmussen, S. A., D. J. Jamieson, M. A. Honein and L. R. Petersen** (2016). "Zika  
986 Virus and Birth Defects--Reviewing the Evidence for Causality." *N Engl J Med*  
987 **374**(20): 1981-1987.
- 988 **Rausch, K., B. A. Hackett, N. L. Weinbren, S. M. Reeder, Y. Sadovsky, C. A.**  
989 **Hunter, D. C. Schultz, C. B. Coyne and S. Cherry** (2017). "Screening Bioactives  
990 Reveals Nanchangmycin as a Broad Spectrum Antiviral Active against Zika Virus."  
991 *Cell Rep* **18**(3): 804-815.
- 992 **Reid, D. W. and C. V. Nicchitta** (2015). "Diversity and selectivity in mRNA  
993 translation on the endoplasmic reticulum." *Nat Rev Mol Cell Biol* **16**(4): 221-231.
- 994 **Risco, C., J. R. Rodriguez, C. Lopez-Iglesias, J. L. Carrascosa, M. Esteban and D.**  
995 **Rodriguez** (2002). "Endoplasmic reticulum-Golgi intermediate compartment  
996 membranes and vimentin filaments participate in vaccinia virus assembly." *J Virol*  
997 **76**(4): 1839-1855.
- 998 **Robinson, M. D., D. J. McCarthy and G. K. Smyth** (2010). "edgeR: a  
999 Bioconductor package for differential expression analysis of digital gene expression  
1000 data." *Bioinformatics* **26**(1): 139-140.
- 1001 **Scaturro, P., A. L. Kastner and A. Pichlmair** (2019). "Chasing Intracellular Zika  
1002 Virus Using Proteomics." *Viruses* **11**(9).
- 1003 **Shi, Y. and G. F. Gao** (2017). "Structural Biology of the Zika Virus." *Trends Biochem*  
1004 *Sci* **42**(6): 443-456.
- 1005 **Shoeman, R. L., B. Honer, T. J. Stoller, C. Kesselmeier, M. C. Miedel, P. Traub**  
1006 **and M. C. Graves** (1990). "Human immunodeficiency virus type 1 protease cleaves  
1007 the intermediate filament proteins vimentin, desmin, and glial fibrillary acidic  
1008 protein." *Proc Natl Acad Sci U S A* **87**(16): 6336-6340.
- 1009 **Shoeman, R. L., C. Huttermann, R. Hartig and P. Traub** (2001). "Amino-terminal  
1010 polypeptides of vimentin are responsible for the changes in nuclear architecture  
1011 associated with human immunodeficiency virus type 1 protease activity in tissue  
1012 culture cells." *Mol Biol Cell* **12**(1): 143-154.
- 1013 **Sirohi, D. and R. J. Kuhn** (2017). "Zika Virus Structure, Maturation, and Receptors."  
1014 *J Infect Dis* **216**(suppl\_10): S935-S944.
- 1015 **Snider, N. T. and M. B. Omary** (2014). "Post-translational modifications of  
1016 intermediate filament proteins: mechanisms and functions." *Nat Rev Mol Cell Biol*  
1017 **15**(3): 163-177.
- 1018 **Sotelo-Silveira, J., M. Crispino, A. Puppo, J. R. Sotelo and E. Koenig** (2008).  
1019 "Myelinated axons contain beta-actin mRNA and ZBP-1 in periaxoplasmic ribosomal

1020 plaques and depend on cyclic AMP and F-actin integrity for in vitro translation." *J*  
1021 *Neurochem* **104**(2): 545-557.

1022 **Stefanovic, S., M. Windsor, K. I. Nagata, M. Inagaki and T. Wileman** (2005).  
1023 "Vimentin rearrangement during African swine fever virus infection involves  
1024 retrograde transport along microtubules and phosphorylation of vimentin by calcium  
1025 calmodulin kinase II." *J Virol* **79**(18): 11766-11775.

1026 **Teo, C. S. and J. J. Chu** (2014). "Cellular vimentin regulates construction of dengue  
1027 virus replication complexes through interaction with NS4A protein." *J Virol* **88**(4):  
1028 1897-1913.

1029 **Terasaki, M., L. B. Chen and K. Fujiwara** (1986). "Microtubules and the  
1030 endoplasmic reticulum are highly interdependent structures." *J Cell Biol* **103**(4):  
1031 1557-1568.

1032 **Turkki, P., M. Laajala, M. Flodstrom-Tullberg and V. Marjomaki** (2020).  
1033 "Human Enterovirus Group B Viruses Rely on Vimentin Dynamics for Efficient  
1034 Processing of Viral Nonstructural Proteins." *J Virol* **94**(2).

1035 **Viktorovskaya, O. V., T. M. Greco, I. M. Cristea and S. R. Thompson** (2016).  
1036 "Identification of RNA Binding Proteins Associated with Dengue Virus RNA in  
1037 Infected Cells Reveals Temporally Distinct Host Factor Requirements." *PLoS Negl*  
1038 *Trop Dis* **10**(8): e0004921.

1039 **Welsch, S., S. Miller, I. Romero-Brey, A. Merz, C. K. Bleck, P. Walther, S. D.**  
1040 **Fuller, C. Antony, J. Krijnse-Locker and R. Bartenschlager** (2009). "Composition  
1041 and three-dimensional architecture of the dengue virus replication and assembly  
1042 sites." *Cell Host Microbe* **5**(4): 365-375.

1043 **Wen, Z., Y. Zhang, Z. Lin, K. Shi and Y. Jiu** (2020). "Cytoskeleton-a crucial key in  
1044 host cell for coronavirus infection." *J Mol Cell Biol*.

1045 **Wickham H** (2016). *ggplot2: Elegant Graphics for Data Analysis*. Springer-Verlag  
1046 New York. ISBN 978-3-319-24277-4, <https://ggplot2.tidyverse.org>.

1047 **Zhang, D.** (2020). "Interplay between endoplasmic reticulum membrane contacts and  
1048 actomyosin cytoskeleton." *Cytoskeleton (Hoboken)* **77**(7): 241-248.

1049 **Zhang, X., H. Shi, J. Chen, D. Shi, H. Dong and L. Feng** (2015). "Identification of  
1050 the interaction between vimentin and nucleocapsid protein of transmissible  
1051 gastroenteritis virus." *Virus Res* **200**: 56-63.

1052 **Zhang, Y., W. Gao, J. Li, W. Wu and Y. Jiu** (2019). "The Role of Host Cytoskeleton  
1053 in Flavivirus Infection." *Virol Sin* **34**(1): 30-41.

1054 **Zhang, Y., Z. Wen, X. Shi, Y. J. Liu, J. E. Eriksson and Y. Jiu** (2020). "The diverse  
1055 roles and dynamic rearrangement of vimentin during viral infection." *J Cell Sci*  
1056 **134**(5).

1057 **FIGURE LEGENDS**

1058 **Figure 1 Rearrangement of vimentin filaments in ZIKV-infected cells. (A)** Human  
1059 U2OS cells were infected with ZIKV (MOI=5) for 16, 24, and 48 h. Viral envelop  
1060 (Env) protein and vimentin were stained with respective antibodies, and nuclear was  
1061 stained with DAPI. The white dotted line indicates the outline of the cell. Scale bar 15  
1062  $\mu\text{m}$ . **(B)** Quantification of the proportion of vimentin area versus overall cell area  
1063 shown in (A). Each point represents a single cell. \*\*\* $P < 0.001$  (unpaired  $t$ -test). **(C)**  
1064 Time course of the accumulated intracellular ZIKV RNA (MOI=0.1) levels measured  
1065 by qRT-PCR (corresponding to the left axis) and relative vimentin area changes  
1066 (MOI=5) (corresponding to the right axis), upon ZIKV infection. Error bars indicated  
1067 means  $\pm$  SEM from three independent experiments. **(D)** The dynamic rearrangement  
1068 of vimentin in vimentin-mCherry-expressing cells infected with ZIKV (MOI=5).  
1069 Scale bar 30  $\mu\text{m}$ . **(E)** Time course of accumulated intracellular ZIKV Env protein  
1070 level measured by western blot in infected U2OS cells (MOI=0.1). The expression  
1071 levels of vimentin, tubulin and actin were not affected by ZIKV infection with  
1072 GAPDH as control. **(F)** Cells were immunostained for vimentin (red) and viral Env  
1073 (green) at 48 hpi, and visualized by structured illumination microscopy (3D-SIM).  
1074 White square in the left panel indicates the magnified area shown in the  
1075 corresponding color image on the right. Orthogonal sections and 3D reconstruction  
1076 shows that vimentin encapsulates viral Env to form a cage-like structure. Scale bar 15  
1077  $\mu\text{m}$  in the left panel, 2  $\mu\text{m}$  in the middle orthogonal view panel, 5  $\mu\text{m}$  in the XZ panel,  
1078 5  $\mu\text{m}$  in the YZ panel and 5  $\mu\text{m}$  in the right clipping plane panel. **(G)** Transmission  
1079 electronic microscopy images of 70 nm thin sections of resin-embedded cells infected  
1080 with ZIKV (MOI=5). White square indicates the magnified area shown in the  
1081 corresponding color image on the right. IFs, intermediate filaments indicated with red  
1082 lines; MTs, microtubules indicated with green lines; vRCs, viral replication  
1083 compartments indicated with blue circle. Scale bar 500 nm in the cell images.

1084

1085 **Figure 2 Expression of ZIKV envelop protein induces vimentin rearrangement.**

1086 (A) The dynamic rearrangement of vimentin in vimentin-mCherry-expressing cells  
1087 transfected with ZIKV Env-EGFP plasmid. Scale bar 10  $\mu\text{m}$ . (B) Plot profile analysis  
1088 of Env-EGFP and vimentin-mCherry intensities in the white dotted box in (A) at  
1089 corresponding time point. Distance in Axis X represents horizontal distance through  
1090 the selection. (C) Vimentin filaments gather scattered viral Env protein towards  
1091 peri-nucleus region. N and white box in the left panels indicate cell nucleus and the  
1092 magnified area shown in the corresponding right panel. The dotted circles indicated  
1093 the positions of one ZIKV-Env foci, and the dotted white lines indicated the shape of  
1094 one vimentin filament. Scale bar 2  $\mu\text{m}$  in the cell images and 1  $\mu\text{m}$  in the magnified  
1095 images.

1096

1097 **Figure 3 Depletion of vimentin results in disruptive replication compartments**  
1098 **and subsequent reduced ZIKV infection.** (A) WT, vimentin KO (VIM KO),  
1099 vimentin-full-length re-introducing (VIM RES) and vimentin-unit-length-filament  
1100 (VIM ULF) re-introducing cells were infected with ZIKV (MOI=5) for 24 h. Cell  
1101 were fixed and immunostained to visualize ZIKV Env, vimentin and nucleus. Scale  
1102 bar 15  $\mu\text{m}$ . (B) Quantification of the percentages of cells with segregated ZIKV Env  
1103 in WT, VIM KO, VIM RES and VIM ULF conditions. Each point represents an  
1104 independent experiment. (C) Quantification of the percentage of total ZIKV Env area  
1105 to overall cell area in WT, VIM KO, VIM RES and VIM ULF conditions. Each point  
1106 represents an infected cell. (D-F) Intracellular ZIKV RNA (D), ZIKV Env protein  
1107 level (E) and titers of ZIKV particles (F) in infected WT and vimentin KO cells  
1108 (MOI=0.1) were measured by two-step qRT-PCR, western blotting, and plaque assay,  
1109 respectively. Results from three independent experiments are shown. (G) Percentage  
1110 of infected WT and VIM KO cells (MOI=1, 48 hpi) measured by flow cytometry. (H)  
1111 Percentage of infected WT and VIM KO cells (MOI=5) measured by  
1112 immunofluorescence. Scale bar 100  $\mu\text{m}$ . Error bars indicated means  $\pm$  SEM.

1113

1114 **Figure 4 Depletion of vimentin influences the production and stability of viral**



1115 **components after entering cells. (A-B)** Time course of accumulated intracellular  
1116 ZIKV RNA in infected WT and vimentin KO (VIM KO) cells (MOI=0.1) measured  
1117 by qRT-PCR. **(B)** Time course of accumulated intracellular ZIKV Env protein in  
1118 infected WT and VIM KO cells (MOI=0.1) measured by western blots. Numbers in  
1119 the blots indicated the levels of ZIKV Env normalized to GAPDH. **(C)** The schematic  
1120 diagram of drug treatment experiment. Cells were transiently transfected with  
1121 E-EGFP plasmid for 36h, and then treated with MG132 (10  $\mu$ M), NH<sub>4</sub>Cl (25 mM) and  
1122 CHX (20  $\mu$ g/mL) for 11 h. **(D)** Western blotting analysis of viral protein upon CHX  
1123 treatment. **(E)** Western blotting analysis of viral protein upon MG132 treatment,  
1124 where detection of P21 accumulation serves as positive control. **(F)** Western blotting  
1125 analysis of viral protein upon NH<sub>4</sub>Cl treatment, where detection of LC3 accumulation  
1126 serves as positive control. **(G)** The schematic diagram of ZIKV binding and entry  
1127 assay. **(H)** ZIKV RNA levels from bound and internalized ZIKV were measured by  
1128 qRT-PCR. The data are from three independent experiments. \*\*\*P<0.001 (2way  
1129 ANOVA). Error bars indicated means  $\pm$  SEM.

1130

1131 **Figure 5 Interaction between vimentin and ER-localized RNA-binding**  
1132 **components affects ZIKV infection. (A)** The top 10 significant GO terms in  
1133 molecular function are shown in the bubble chart. **(B)** The top 10 significant GO  
1134 terms in biological process are shown in the bubble chart. **(C)** All 17 significant  
1135 cellular components with count number greater than 50 genes are shown in the bubble  
1136 chart. **(D)** Biological process enrichment analysis of significantly down-regulated  
1137 genes in ZIKV infected VIM KO cells compared with infected WT cells (MOI=1, 24  
1138 hpi) by RNA-Seq. The top 10 enriched terms are shown in the bubble chart. In (A-D),  
1139 the color of the bubbles displayed from red to blue indicated the descending order of  
1140  $-\log_{10}(\text{Padj})$ . The sizes of the bubbles are displayed from small to large in ascending  
1141 order of gene counts. The x and y axis represent the gene ratio and the GO terms,  
1142 respectively. **(E)** List of ER-located proteins interacting with vimentin by setting the  
1143 coverage peptides threshold over 30% from mass spectrometry assay. **(F)** Heatmap of

1144 significantly differentially expressed genes (ER-annotated) between ZIKV infected  
1145 WT and VIM KO cells (MOI=1, 24 hpi) identified by RNA-Seq (n=3 independent  
1146 experiments per condition).

1147

1148 **Figure 6 Vimentin interacts with ER-located RRBP1 to regulate ZIKV infection.**

1149 **(A)** The domain structure of RRBP1 protein. Red lines represent the peptides  
1150 interacting with vimentin identified from mass spectrometry. **(B)** *in vitro* binding  
1151 assay of vimentin with RRBP1. Cell lysates were incubated with purified recombinant  
1152 his-tagged vimentin protein, and analyzed by anti-RRBP1 antibody in western  
1153 blotting. **(C)** Immunofluorescence images of vimentin, RRBP1 and ZIKV RNA in  
1154 WT and vimentin KO (VIM KO) cells infected with ZIKV (MOI=2) for 24 h, and  
1155 stained with anti-dsRNA, anti-RRBP1 and anti-vimentin antibodies and DAPI for  
1156 nucleus. Scale bar 15  $\mu$ m. **(D,E)** Quantifications of RRBP1 intensities (D) and areas  
1157 (E) in non-infected (MOCK) WT and VIM KO cells. Each point represents a single  
1158 cell. \*\*\* $P$ <0.001 (unpaired  $t$ -test). **(F)** Quantification of the colocalization between  
1159 RRBP1 and dsRNA in ZIKV infected WT and VIM KO cells by Pearson's  
1160 coefficients. Each point represents a single cell. \*\*\* $P$ <0.001 (unpaired  $t$ -test). **(G)**  
1161 Western blots demonstrated that RRBP1 was efficiently knockdown by shRNA in  
1162 both WT and VIM KO cells. Numbers in the blots indicated the levels of RRBP1  
1163 normalized to GAPDH. **(H)** Quantifications of ZIKV RNA copies detected by  
1164 qRT-PCR, and normalized to GAPDH, in WT, RRBP1 knockdown (RRBP1 KD),  
1165 VIM KO and RRBP1 knockdown; vimentin knockout (RRBP1 KD;VIM KO)  
1166 conditions. The cells were infected with ZIKV at MOI=0.1 for 24 h, and the data are  
1167 from three independent experiments. **(I)** Protein levels of RRBP1, vimentin, ZIKV  
1168 Env in WT and vimentin KO cells detected by western blots, which were also probed  
1169 with vimentin antibody to confirm the KO efficiency and GAPDH antibody to verify  
1170 equal sample loading.



## Figure 1

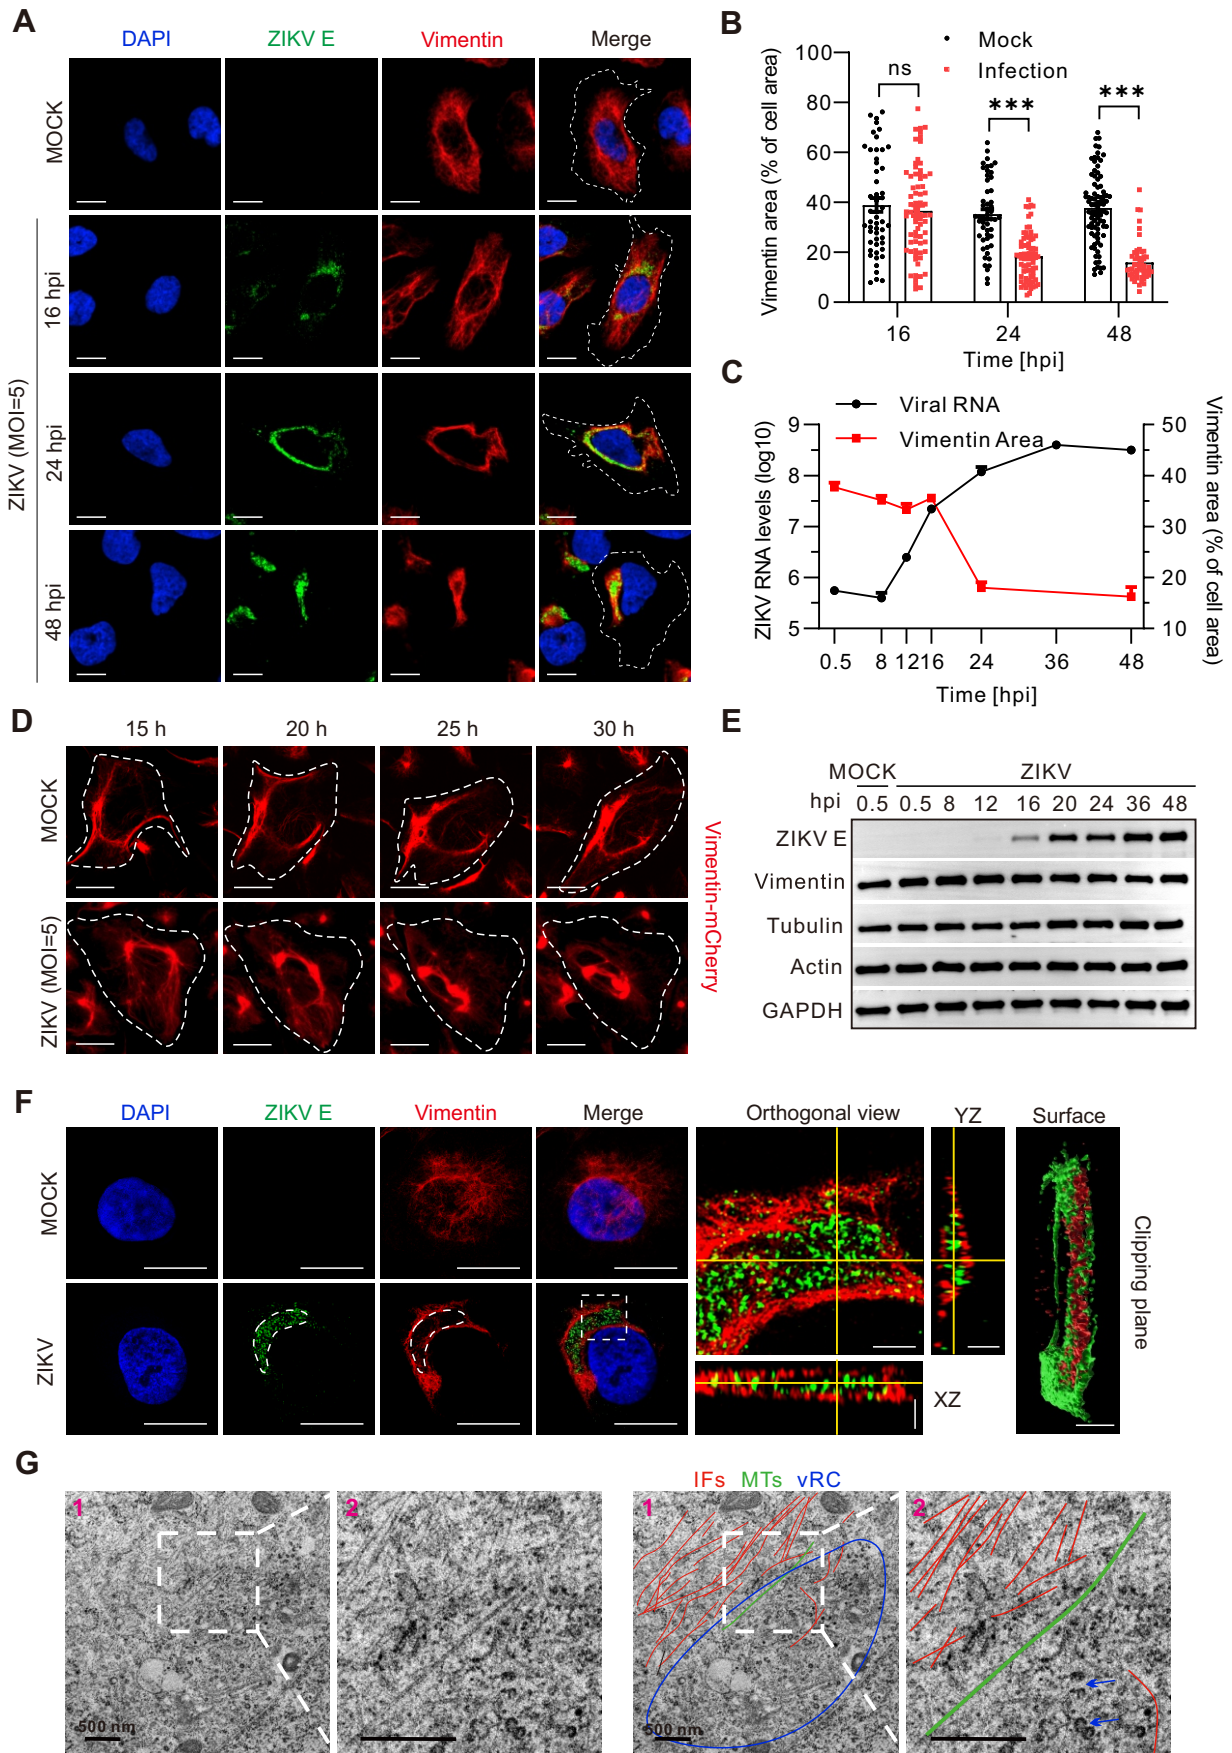

**Figure 2**

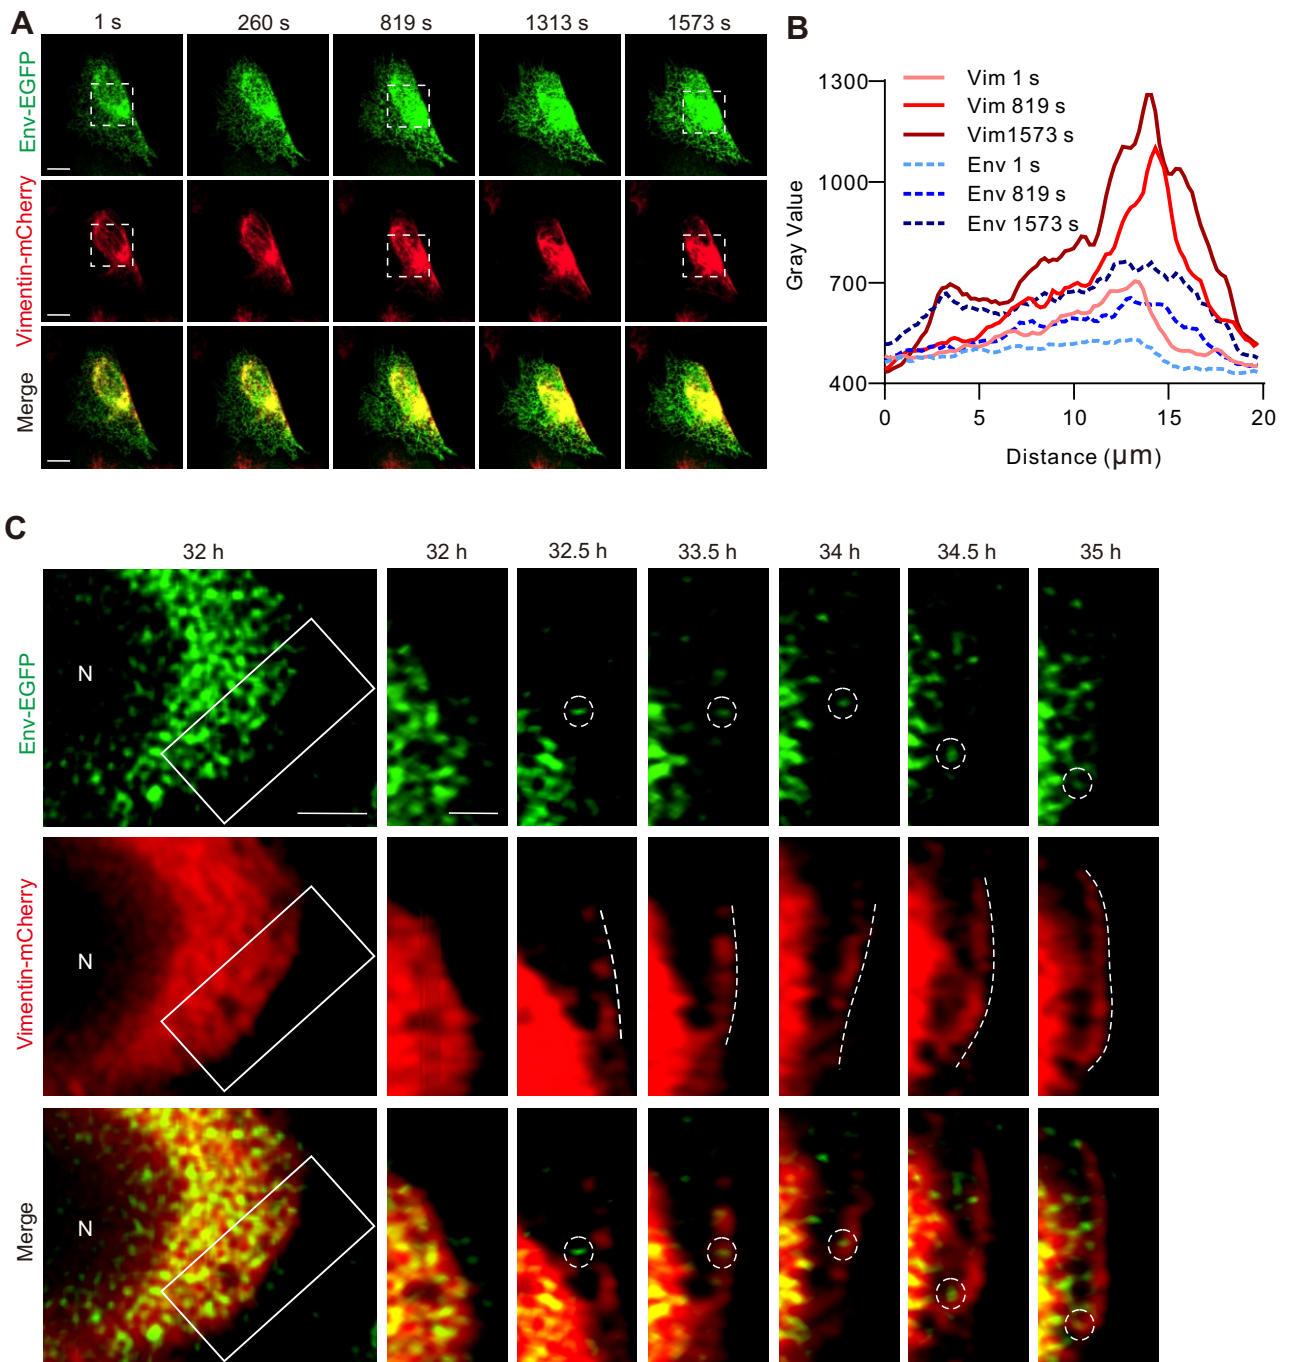

**Figure 3**

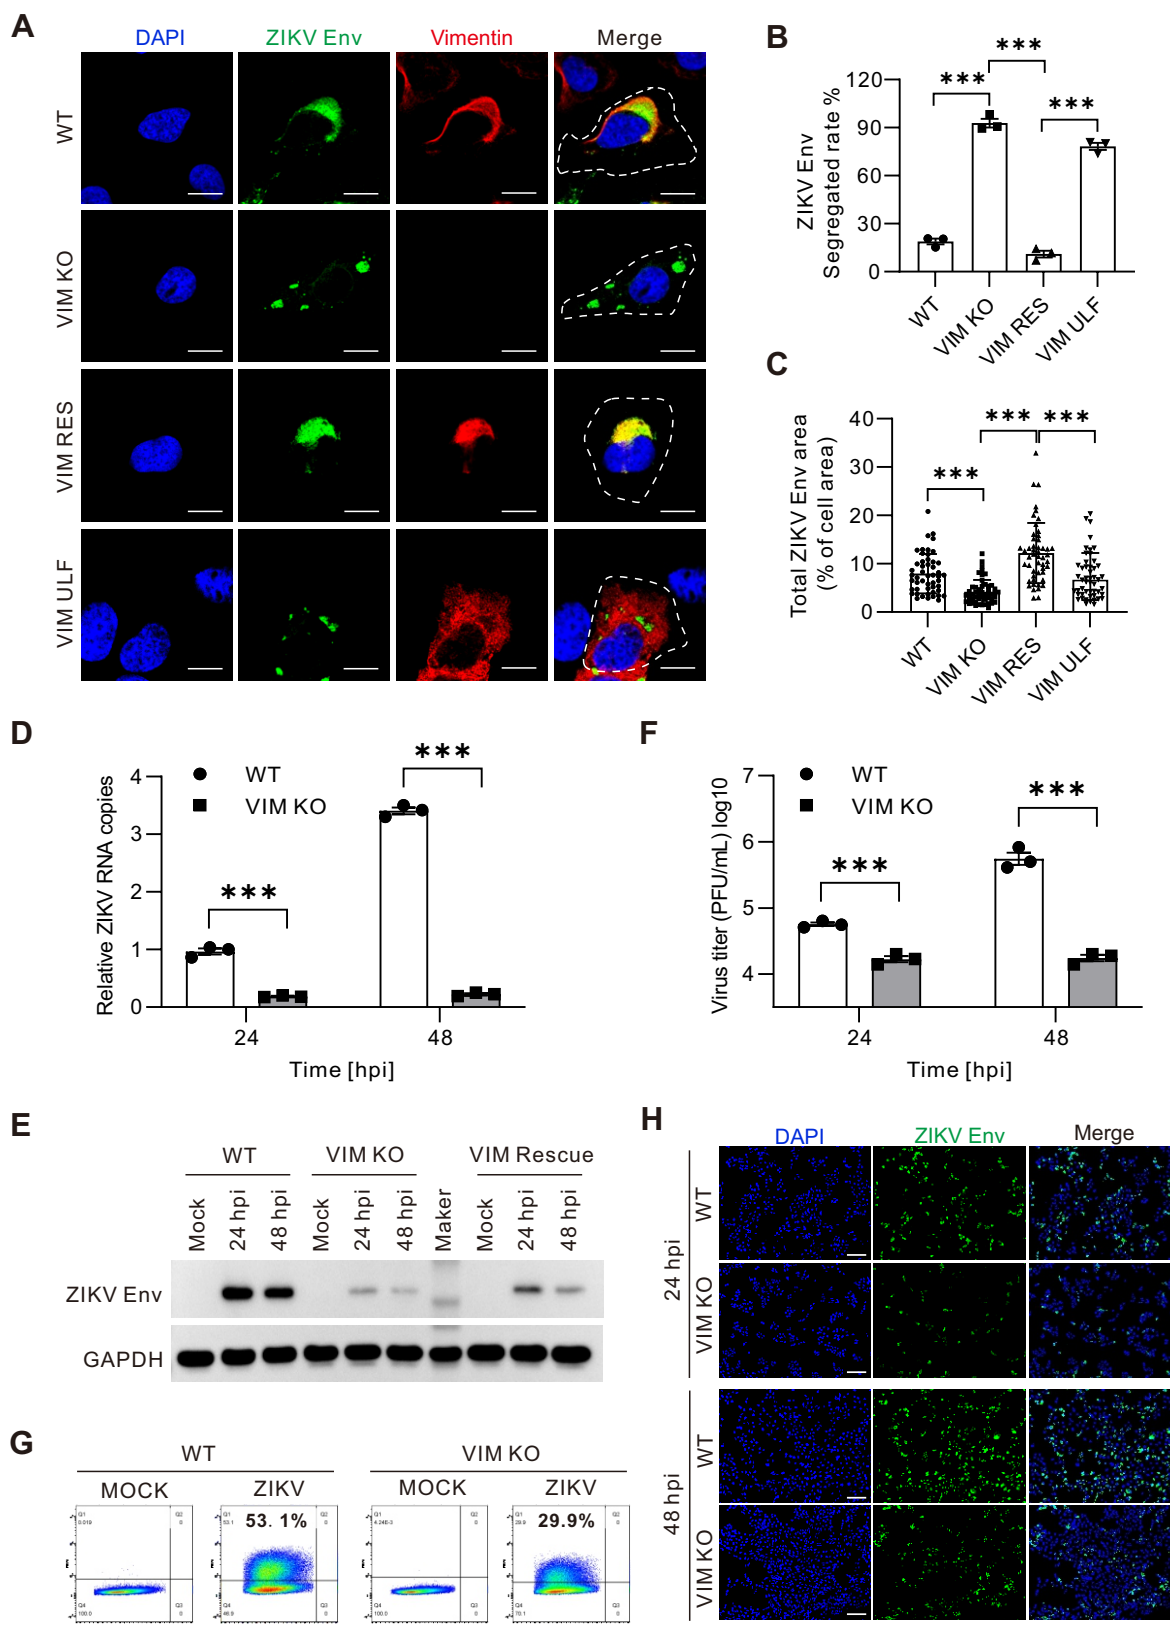

**Figure 4**

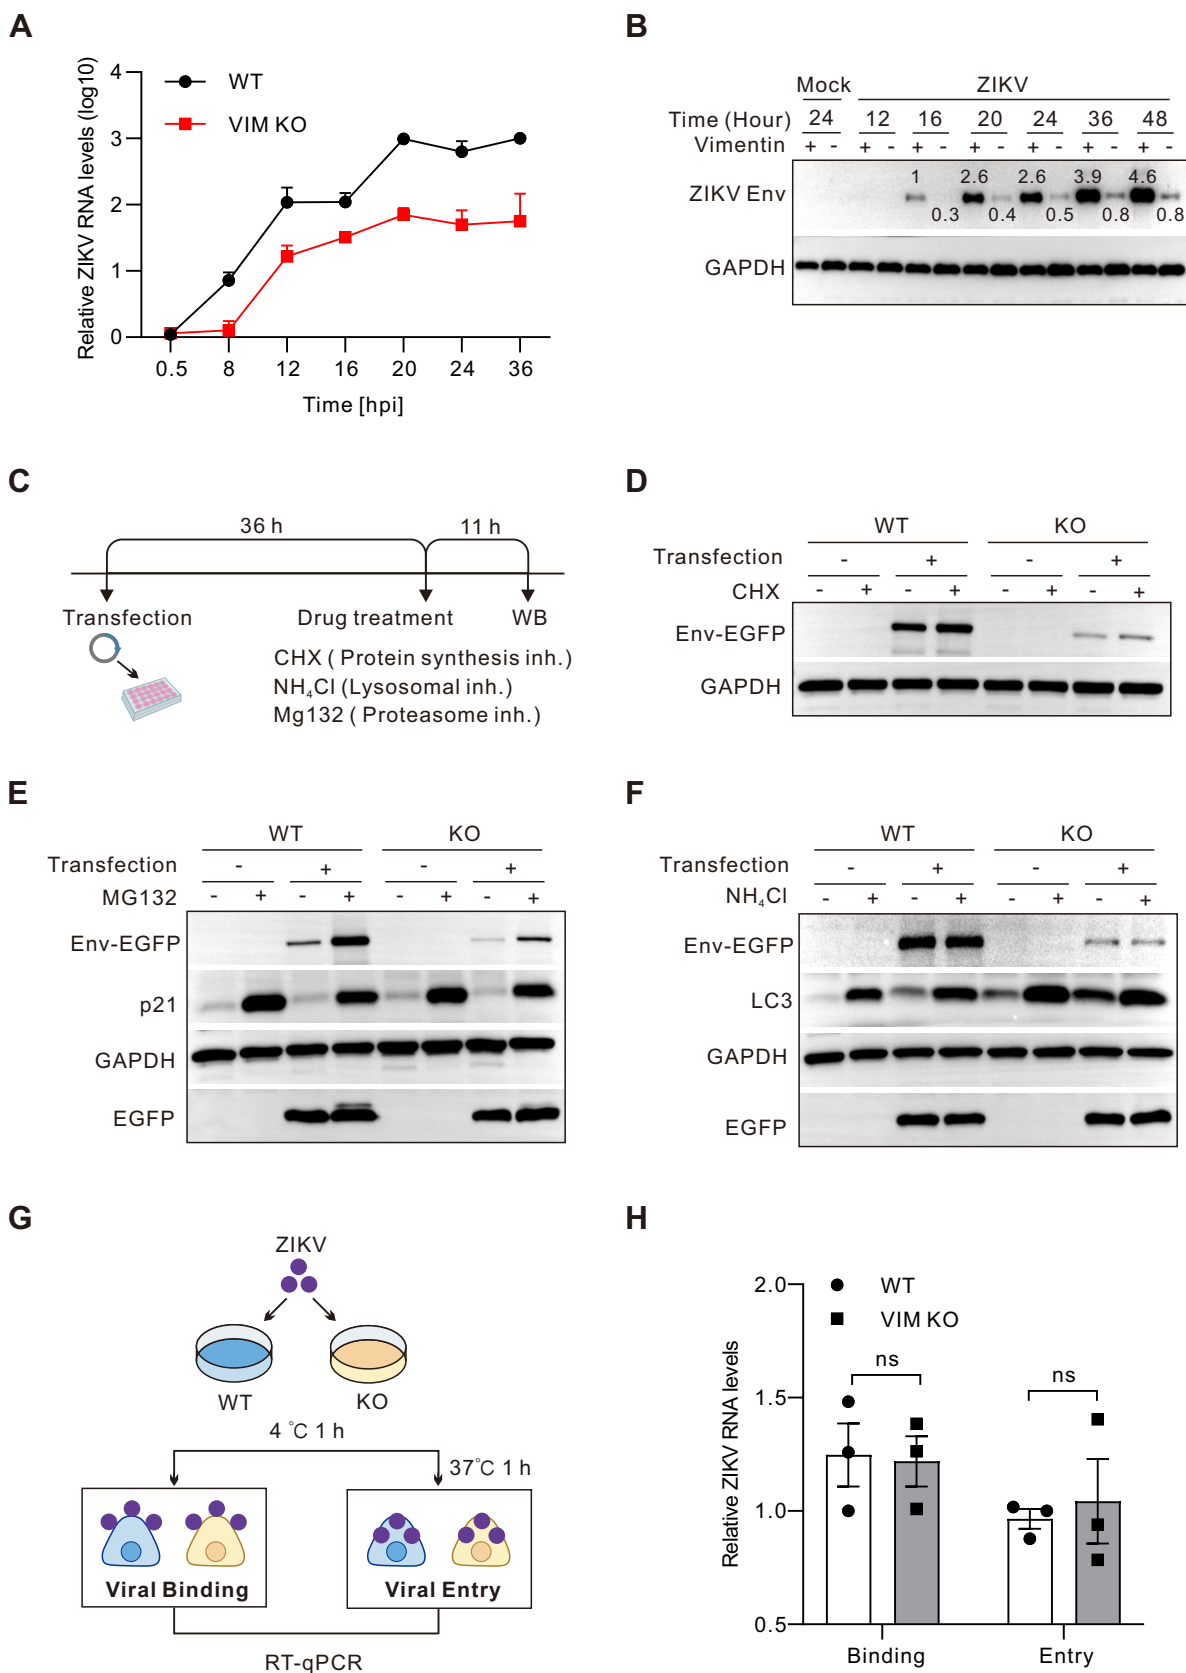

**Figure 5**

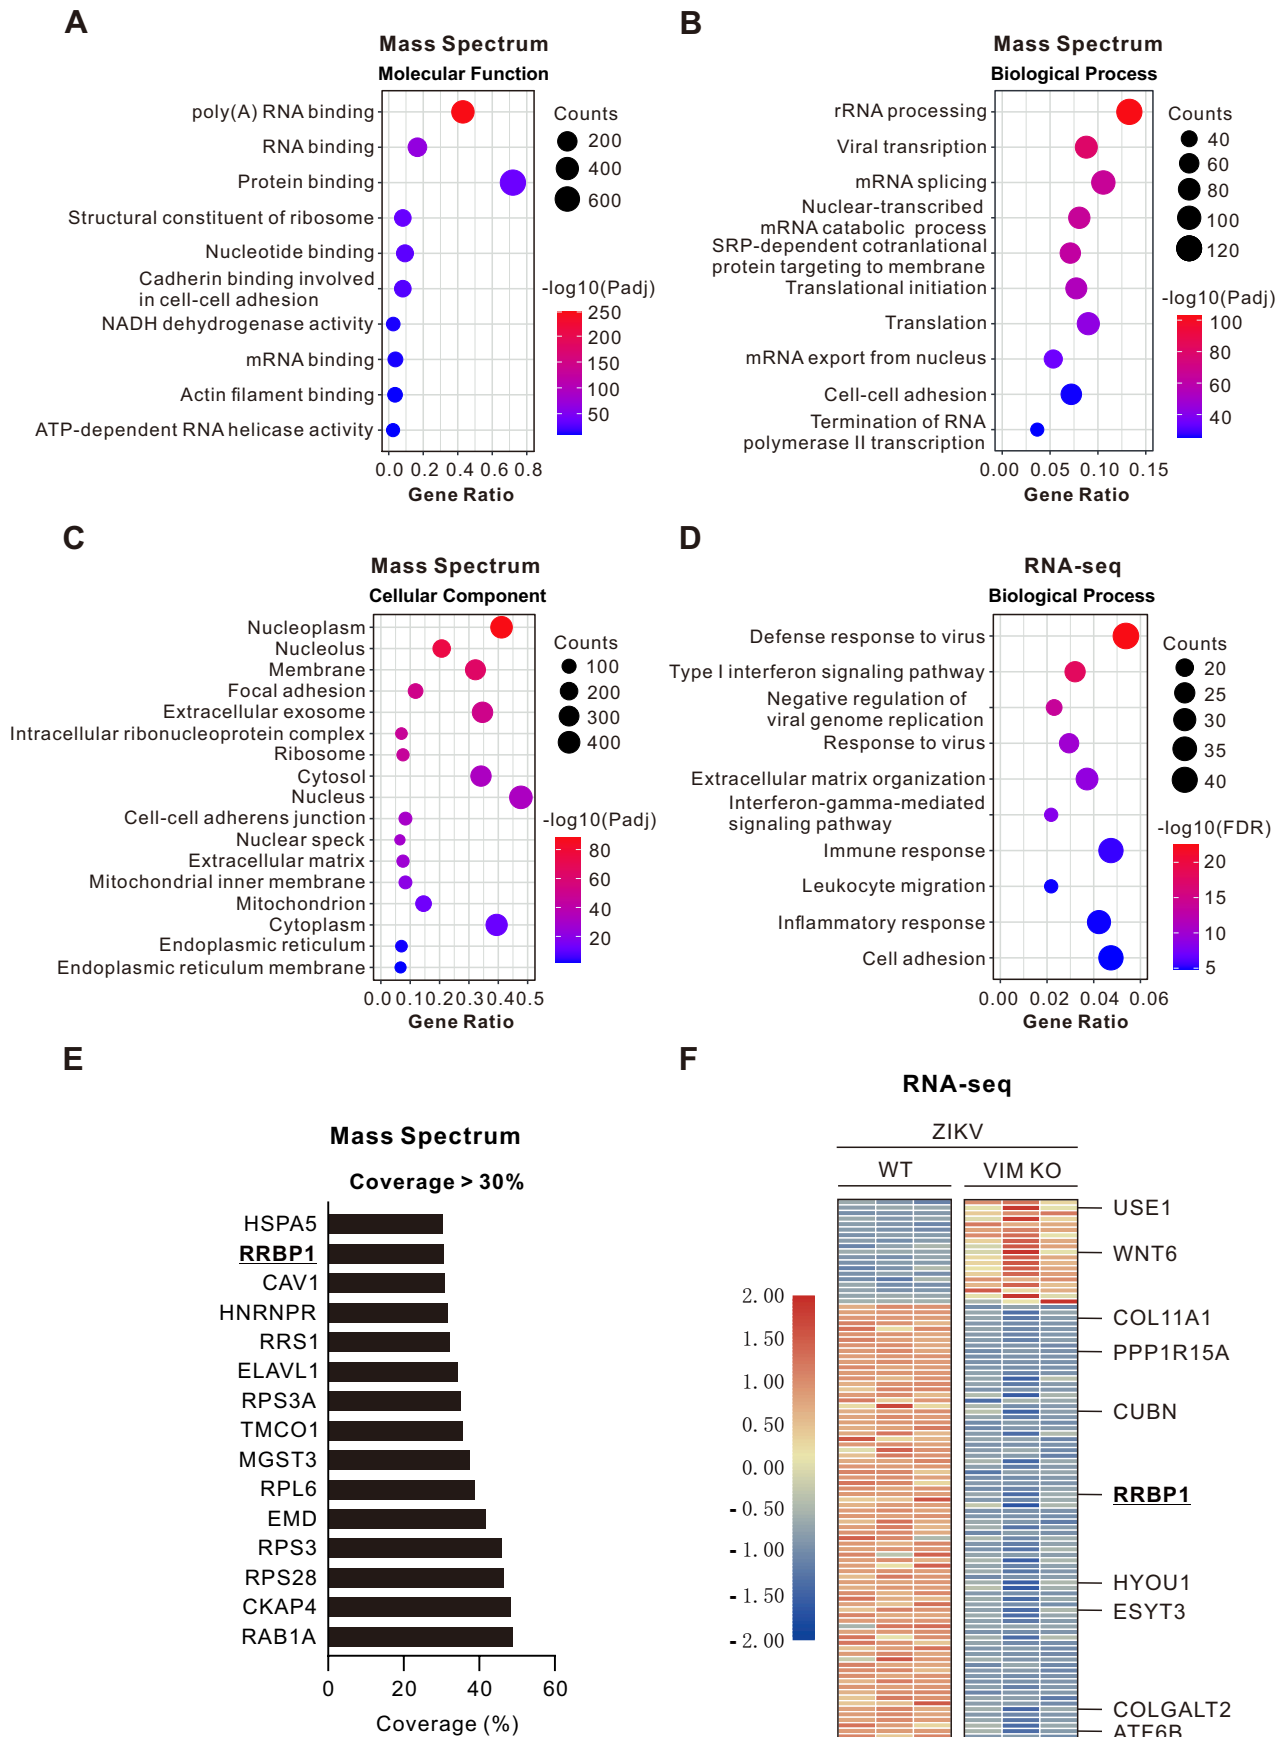



**Figure 6**

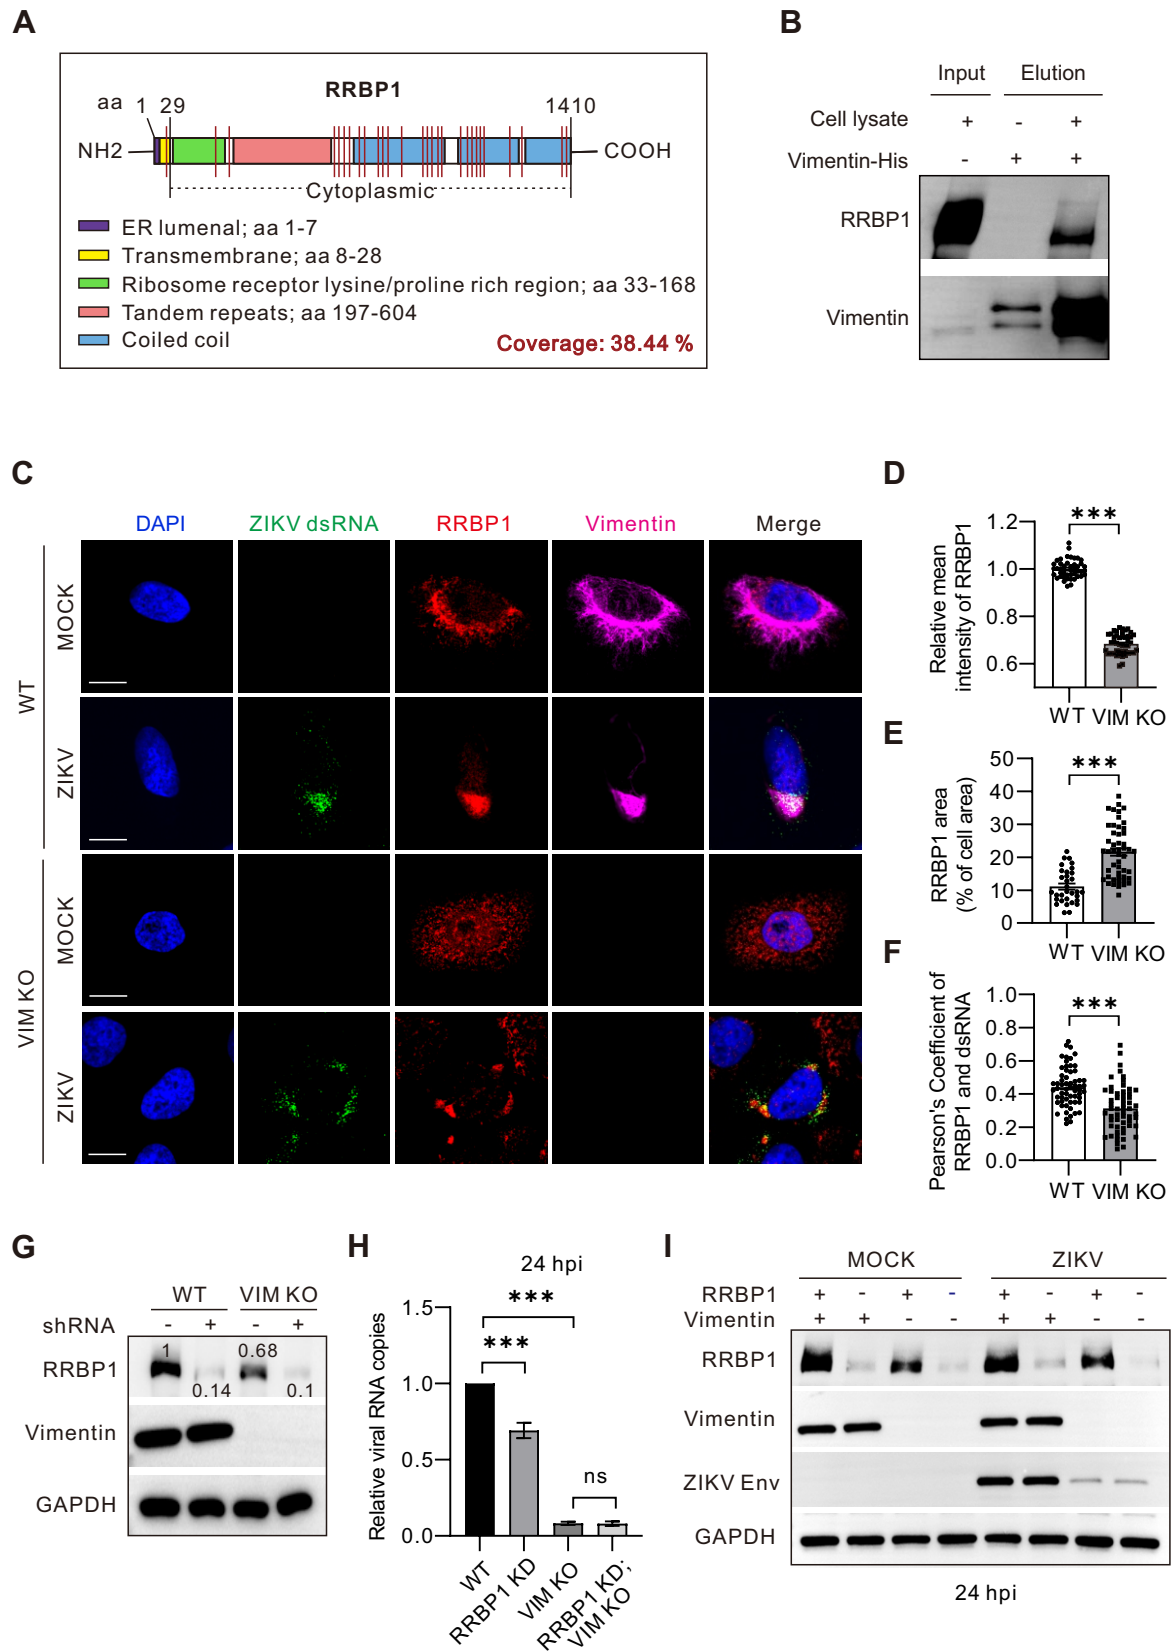

Source: http://biorxiv.org/content/10.1101/2021.04.25.441301v1.full.pdf
